1 **Membrane-proximal external region is a superior target for mediating effector**  
2 **activity of HIV-1 specific chimeric antigen receptor modified T cells.**

3

4 Emiko Kranz<sup>1,2</sup>, Joshua Chan<sup>1,2</sup>, Maya Hashimoto<sup>1,2</sup>, Toshio Kanazawa<sup>1,2</sup>, Hanlu Wang<sup>1,2</sup>,  
5 and Masakazu Kamata<sup>1,2,#\*</sup>

6

7 <sup>1</sup>Division of Hematology-Oncology, David Geffen School of Medicine at UCLA, Los  
8 Angeles, CA 90095, USA

9 <sup>2</sup>UCLA AIDS Institute, Los Angeles, CA 90095, USA

10 #Current Address: Department of Microbiology, University of Alabama at Birmingham, AL  
11 35205, USA

12

13 \*Corresponding author

14 E-mail: [masa3k@uab.edu](mailto:masa3k@uab.edu)

15

16 **Abstract**

17 The use of chimeric antigen receptor modified-T (CAR-T) cells in adoptive  
18 immunotherapy has been popularized through recent success in the field of cancer  
19 treatment research. CD4 $\zeta$  CAR, which targets HIV-1-infected cells, has been developed  
20 and evaluated in patients. Though well-tolerated for over a decade, efficacy was  
21 disappointingly limited. This result encourages us to develop a novel CAR more effective  
22 than CD4 $\zeta$  CAR. To quantitatively compare anti-HIV-1 activity of different CAR constructs  
23 in a highly sensitive and reproducible manner, we developed a multicolor flow cytometry

24 method for assessing anti-HIV-1 effector T-cell activity. “Target” Jurkat cells inducibly  
25 expressing an HIV-1<sub>HXB2</sub> envelope protein and “Non-target” control cells were genetically  
26 labeled with red and blue fluorescent protein, respectively, and co-incubated with human  
27 primary T cells transduced with anti-HIV-1 “Effector” CARs at various Effector vs Target  
28 cell ratios. Absolute cell numbers of each population were collected by MACSQuant  
29 Analyzer and used for calculation of relative cytotoxicity. We successfully ranked the  
30 cytotoxicity of three previously reported single chain-antibody CARs and six newly  
31 developed single-domain antibody CARs in comparison to CD4ζ CAR. Interestingly, three  
32 CARs—10E8, 2E7, and 2H10—which demonstrate high cytotoxic activity were all known  
33 to target the membrane-proximal external region. Use of this novel assay will simplify  
34 assessment of new CAR constructs and in turn accelerate the development of new  
35 effective CARs against HIV-1.

36

## 37 **Author Summary**

38 Adoptive immunotherapies that utilize autologous T cells expressing a desired  
39 antigen-specific CAR aim to elicit directed immune responses. In recent years, CAR  
40 immunotherapies have been promoted extensively in B cell malignancy treatments. The  
41 HIV-1-targeting CAR, known as CD4ζ, was developed over 20 years ago and has been  
42 widely and longitudinally tested in patients. However, its effectiveness was hindered by  
43 poor survival and functionality of the transduced cells. To conduct quantitative evaluation  
44 of newly designed anti-HIV-1 CARs, we developed a novel multicolor flow-based assay  
45 for HIV-1-specific cytotoxicity, enabling sensitive and quantitative assessment in a high-  
46 throughput fashion. This assay would be also useful in screening HIV-1-targeting immune

47 receptors—including CARs and T cell receptors—and other immunotherapeutic drugs  
48 such as anti-HIV-1 antibodies.

49

## 50 **Introduction**

51 Chimeric antigen receptors (CARs) are artificially engineered receptors that confer  
52 a desired specificity to immune effector T cells such as CD4<sup>+</sup> (as a helper T cell) and  
53 CD8<sup>+</sup> (as a cytotoxic T cell) [1-6]. When a CAR encounters its target ligand, it signals the  
54 cell in a T cell receptor (TCR)-like manner, but not in a human leukocyte antigen (HLA)-  
55 dependent manner; thus, this approach can be utilized in treatments for anyone. The use  
56 of CAR-modified T (CAR-T) cells has been applied extensively in anti-cancer research,  
57 such as with solid organ tumors and lymphomas [6-12].

58 A promising candidate for use in anti-HIV-1 adoptive therapy is the CD4 $\zeta$  CAR,  
59 which contains extracellular domains from CD4, a major HIV-1 receptor, and an internal  
60 signaling domain derived from CD247, a CD3 $\zeta$ -chain. CD4 $\zeta$  CAR utilizes the CD4  
61 recognition site to respond to an HIV-1 envelope protein that lies on the exposed surface  
62 of infected cells. Once activated, the  $\zeta$ -chain emits a signal to trigger potent effector  
63 function against infected cells [13-21]. This CAR has been widely and longitudinally tested  
64 in patients over 500 patient years [22-25]. Treatment was safe and well-tolerated for over  
65 a decade, but antiviral effects were limited, most likely due to poor maintenance of gene-  
66 modified cells. These results facilitated the restructuring of CD4 $\zeta$  CAR to preserve its  
67 inherent potential as well as to heighten its antiviral capabilities, leading to the creation of  
68 a new CAR line: novel anti-HIV-1 CARs using a single chain (scFv) form of broadly  
69 neutralizing antibodies (bNAbs) [26-29].

70 Cytotoxic assays are used to determine the efficiency of a CAR's cytotoxic activity  
71 by observing its ability to kill "Target" cells that express the epitope recognized by a  
72 corresponding "Effector" CAR. The radioactive chromium (<sup>51</sup>Cr)-release method  
73 developed in 1968 has traditionally been used to determine the cytotoxic activity of  
74 effector cells[30]. Although the assay is reliable and has become a "gold standard," it has  
75 a number of disadvantages and functional limitations such as low sensitivity, risk of  
76 radioactive contamination, and spontaneous release of <sup>51</sup>Cr contributing to heightened  
77 background levels that tend to limit its application in quantitative assessment and high-  
78 throughput screening. To overcome these issues, several nonradioactive methods have  
79 been developed that mainly use fluorescent dyes [31-42]. However, despite the  
80 advantage of working with nonradioactive material, these methods have not yet found a  
81 broad acceptance—likely due to the labor-intensive procedure, wide variability across  
82 assays, and low reproducibility in results.

83 To perform quantitative evaluation of newly designed CARs with high  
84 reproducibility and accuracy, we developed a novel multicolor flow cytometry-based  
85 assay for HIV-1-specific effector activity. The assay uses two cell lines: "Target", which is  
86 genetically labeled by a red-fluorescent protein (mCherry) and inducibly expresses HIV-  
87 1<sub>HXB2</sub> envelope proteins, and "Non-target," which is labeled by a blue fluorescent protein  
88 (TagBFP) but does not express the HIV-1 envelope proteins. To minimize non-specific  
89 cell death by mismatched major-histocompatibility complex (MHC), the surface  
90 expression of MHC was first eliminated from both Non-target and target cells by knocking  
91 out the  $\beta$ 2 microglobulin ( $\beta$ 2MG) gene with CRISPR gene editing technology[43]. In  
92 addition, low CD4-expressing populations of these cells were further selected to minimize

93 spontaneous cell death initiated by HIV-1 envelope mediating cell fusion[44]. Equal  
94 numbers of Target and Non-target cells are co-incubated with CAR-T effector cells in  
95 various ratios for 16 hours. HIV-1-specific cytotoxicity is determined by counting absolute  
96 cell numbers of each population. This assay enables assessment of HIV-1-specific  
97 cytotoxicity at a single cell level, allowing for quantitative and simple numerical analysis  
98 of results rather than relying on measurements of a released substance. These benefits  
99 expand the applicability of the assay, allowing for personalization according to the  
100 samples present without sacrificing efficiency.

101

## 102 **Results**

### 103 **Generation of target cells for HIV-1-specific effector cell assay.**

104 The  $^{51}\text{Cr}$ -release assay has been known as the gold standard for evaluating  
105 effector T cell activity [30]. The main difficulty with the  $^{51}\text{Cr}$  assay lies in the complications  
106 that arise from variation in  $^{51}\text{Cr}$  labeling due to spontaneous release of  $^{51}\text{Cr}$ , elevating  
107 background levels substantially. The success and analytical quality of flow cytometry-  
108 based assays hinges considerably on the reproducibility of results—the basis of this  
109 consistency lies in the quality of an assay's Target cell population. To remedy these  
110 issues presented by the  $^{51}\text{Cr}$  assay, we have developed a novel cell line stably expressing  
111 fluorescent protein that is not spontaneously released, unless the integrity of the cell  
112 surface membrane is compromised due to attacks by such as cytotoxic T cells. We utilized  
113 two different Jurkat cell lines previously established: Target, which inducibly expresses  
114 HIV-1<sub>HXBC2</sub> envelope proteins upon doxycycline (DOX) removal from the culture medium,  
115 and Non-target, which does not express the HIV-1 envelope proteins [45]. To minimize

116 cytotoxicity mediated by allogeneic reactions because of mismatched MHC, we first  
117 eliminated MHC surface expression via gene targeting of  $\beta$ 2MG using CRISPR/Cas9  
118 technology (**S1 Fig**). The cells were then modified by genetic labeling with mCherry for  
119 Target cells (HXBC2) or TagBFP for Non-target cell ( $\Delta$ KS). Fluorescently labeled  
120 populations with missing HLA expression were sorted by FACS Aria II along with a CD4  
121 dimmer population to minimize cell fusion induced by the interaction between HIV-1  
122 envelope and CD4 (**Figs 1B,C**). HIV-1 envelope protein expression of resultant cells was  
123 confirmed by western blotting using antibodies against HIV-1 gp120 (2G12) and gp41  
124 (2F5) 4 days after removal of doxycycline (DOX) from the culture medium (**Fig 1D**) as  
125 well as flow cytometry using a fusion protein of soluble human CD4 and Fc portion of  
126 human IgG1 (sCD4 Fc), followed by APC-conjugated anti-human Ig Fc (**Fig 1E**).  
127 Importantly, levels of HIV-1 envelope expression in HXBC2 on days 9 and 12 were similar  
128 to those of primary human CD4 T cells infected by two different HIV-1 strains.

129

130 **Fig 1. Generation of Jurkat cells inducibly expressing envelope protein from HIV-**  
131 **1<sub>HXBC2</sub> (HXBC2).**

132 **(A)** Schematic of lentiviral vectors for expressing TagBFP and mCherry. These vectors  
133 have an FG12-derived backbone possessing a self-inactivating LTR, central polypurine  
134 tract (cPPT), ubiquitin C promoter (UbiC), and a mutant Woodchuck Hepatitis Virus  
135 Posttranscriptional Regulatory Element (WPRE). **(B)** Jurkat cells with or without inducibly  
136 expressing envelope protein from HIV-1<sub>HXBC2</sub> first had human- $\beta$ 2 microglobulin ( $\beta$ 2MG)  
137 expression knocked out by CRISPR-Cas9 gene editing using a non-integrating lentiviral  
138 vector encoding Cas9 together with sgRNA specific for  $\beta$ 2MG as shown in **S1 Fig**.

139 Populations missing human-leukocyte antigen (HLA)-I A, B, and C expression were  
140 negatively enriched by magnetic bead separation, followed by transduction with a  
141 lentiviral vector encoding either TagBFP for  $\Delta$ KS or mCherry for HXBC2. Cells were then  
142 labeled by PE/Cy7-conjugated anti-human HLA-I A,B,C and BV711-conjugated human  
143 CD4 antibodies then further selected for TagBFP<sup>+</sup>/HLA-I A,B,C/CD4<sup>dim</sup> ( $\Delta$ KS) or  
144 mCherry<sup>+</sup>/HLA-I A,B,C/CD4<sup>dim</sup> (HXBC2) populations by FACSAria II flow sorter. **(C)**  
145 Equal numbers of  $\Delta$ KS, HXBC2, and unmodified Jurkat cells were mixed and analyzed  
146 on LSRT Fortessa for TagBFP and mCherry expression. **(D)** HXBC2 cells were cultured for  
147 4 days in the presence or absence of 1  $\mu$ g/ml doxycycline (DOX) to induce HIV-1<sub>HXBC2</sub>  
148 envelope expression. Five million cells were lysed in 1% CHAPS and HIV-1 envelope  
149 expression was analyzed by western blotting using a mixture of anti-HIV-1 gp41 (2F5)  
150 and anti-HIV-1 gp120 (2G12) antibodies. Numbers to the right of the picture indicate  
151 molecular mass in kilodaltons. +: with DOX, -: without DOX. **(E)** A fusion protein of soluble  
152 human CD4 and Fc portion of human IgG1 (sCD4 Fc) was used for detection of HIV-1  
153 envelope expression on cell surface. One million HXBC2 cells cultured in the absence  
154 (red) or presence (blue) of DOX for 6, 9, and 12 days were incubated with 1  $\mu$ g sCD4 Fc  
155 on ice, followed by APC-conjugated anti-human Ig Fc portion. Human primary T cells (two  
156 donors) were infected with HIV-1<sub>AD8</sub> and HIV-1<sub>BaL</sub> and used as a positive control for levels  
157 of cell surface expression of HIV-1 envelope proteins detected by sCD4 Fc. Gray:  
158 uninfected human primary T cells, Red: HIV-1-infected cells.

159

160 **Establishing HIV-1-specific cytotoxicity assay using multicolor flow cytometry.**

161           Assessment of cytotoxicity in our assay is carried out by counting absolute live cell  
162 populations in each well following co-culture of “Effector”, “Target”, and “Non-target” cells  
163 (**Fig 2**). Target and non-target cells that have been genetically modified to express  
164 different fluorescent proteins are easily characterized by multicolor flow cytometry. Upon  
165 attack by effector cells, their cytoplasmic contents are released into the supernatant and  
166 the number of fluorescent cells decreases, i.e., the loss of fluorescence from cells is used  
167 as an indicator of both decreased membrane integrity and cell death [46]. The same  
168 numbers (10,000 cells/well in a 96 well plate) of HIV-1 envelope-expressing target cells  
169 are co-cultured with non-target cells lacking envelope expression and effector cells  
170 designed to eliminate target cells (**Fig 2A**). Isolated populations of target cells are counted  
171 against those of non-target cells to evaluate apparent cytotoxic activity following co-  
172 culturing with effector cells (**Figs 2B,C**). Our assay is unique not only in its use of uniform  
173 fluorescent marking, but also in its utilization of the MACSQuant system for counting  
174 actual live cell populations. The greatest advantage of this instrument is the fully  
175 automated system, which allows the collection of data in a high throughput manner with  
176 easy operation. Use of automated counting by MACSQuant also proves advantageous in  
177 its consistency, removing complications by human error.

178

179 **Fig 2. Schematic outline of a multicolor flow cytometry-based cytotoxicity assay**  
180 **designed for HIV-1 specific CAR-T cells.**

181 **(A)** Scheme of fluorescent-based cytotoxicity assay. TagBFP<sup>+</sup> control Jurkat cells ( $\Delta$ KS;  
182 Non Target) and mCherry<sup>+</sup> Jurkat cells that inducibly express HIV-1<sub>HXBC2</sub> envelope protein  
183 upon removal of DOX from culture medium (HXBC2; Target).  $\Delta$ KS and HXBC2 cells were



184 co-incubated together with human primary T cells transduced with a vector encoding  
185 CD4 $\zeta$  CAR or a control EGFP vector (CD4 $\zeta$  or EGFP). (**B,C**) Absolute cell number of each  
186 population circled in blue (Non-target) or red (Target) was analyzed by MACSQuant. HIV-  
187 specific cytotoxicity was calculated as relative cytotoxicity as follows: Relative cytotoxicity  
188 (%) = 100 x (1 - Target cell numbers/Non-Target cell numbers). The uncircled population  
189 is composed of effector cells. Data represent the mean  $\pm$  standard deviation from triplicate  
190 wells.

191

### 192 **The assay shows high reproducibility with wide dynamic range.**

193 A comparative assay system relies heavily on consistency of results; such  
194 consistency may be assured by adjusting variables that the cytotoxic effect depends on.  
195 Before we use the above established cell lines for further assays, cells were processed  
196 to isolate single-clone populations since bulk populations consist of heterogeneous cells  
197 that affect the cytotoxicity assay (**Fig 3**). Based on levels of HIV-1 envelope expression  
198 and sensitivity to CD4 $\zeta$  CAR-mediated cytotoxicity, we selected HXBC2 clone #39 and  
199  $\Delta$ KS clone #13 for later experiments. Clone #39 showed stable HIV-1 envelope  
200 expression over 7 days after 8 to 10 days of culture with medium containing no DOX (**Fig**  
201 **3B**) and was able to mediate HIV-1-specific T cell proliferation (**Fig 3C**). HIV-1 specific  
202 cytotoxicity was confirmed after 8 hours of incubation with CD4 $\zeta$  CAR-expressing T cells  
203 and plateaued after 16 hours of incubation (**Fig 3D**).

204 The critical factor to take into consideration for a reproducible assay is the Effector  
205 to Target (E:T) ratio. If there are too few effector cells, cytotoxic activity will appear  
206 inefficient and produce inconclusive results; however, if there are too many effector cells,

207 non-target cells are at risk of collateral cytotoxic effect, resulting in high background  
208 signals. This saturation of effector cells may also result in higher levels of cytotoxic effect  
209 that do not reveal any further understanding of the tested CAR's efficacy. Should such  
210 excessive amounts of effector be used, one would see high levels of killing no matter the  
211 actual capabilities of the CAR. Thus, choosing a ratio before effector function plateaus is  
212 ideal. Ratios ranged from  $2^{-7}$  to  $2^{-2}$  (0.0078125 to 0.25) and levels of cytotoxicity by CD4 $\zeta$   
213 increased in a linear fashion following increased E:T ratio (**Fig 3E**). Although these levels  
214 also elevated in controls (**Fig 3E, EGFP**), the differences of relative cytotoxicity between  
215 CD4 $\zeta$  and EGFP control increased in a linear fashion from  $2^{-7}$  to  $2^{-3}$  and reached a plateau  
216 (**Fig 3E, Difference**). We therefore used the E:T ratios from  $2^{-7}$  to  $2^{-3}$  thereafter.

217

### 218 **Fig 3. Characterization of single cell-derived HXBC2 cells.**

219 Single cell-derived clone for Target (HXBC2 #39) and Non-Target ( $\Delta$ KS #13) cells was  
220 obtained by limiting dilution. **(A)** HXBC2 #39 cells were cultured in medium with no DOX  
221 for 10 days. HIV-1 envelope expression was monitored by sCD4 Fc/APC staining as  
222 described in **Figure 1** (red). Uninduced HXBC2 #39 cells were used as a negative control  
223 (gray). **(B)** Surface expression of HIV-1<sub>HXBC2</sub> envelope protein was monitored daily over  
224 18 days and mean fluorescent intensities (MFIs) were plotted. **(C)** CD4 $\zeta$  CAR-expressing  
225 human primary T cells were co-cultured with  $\Delta$ KS #13 or HXBC2 #39 (E:T ratio = 1:10)  
226 after labeling with cell proliferation dye eFluor 670. Proliferation of CD4 $\zeta$  CAR-T cells was  
227 monitored by dye dilution after 6 days culture. **(D,E)** HIV-1-specific cytotoxicity mediated  
228 by CD4 $\zeta$  CAR was tested with increasing incubation time (8 - 24 hours) **(D)** or different  
229 effector:target ratio (E:T ratios =  $2^{-7}$  to  $2^{-2}$ ) **(E)**. Results were calculated as a relative

230 cytotoxicity as described in **Fig 2** and shown by the mean  $\pm$  standard deviation from  
231 triplicate wells.

232

233 **Anti-HIV-1 CARs targeting gp41 MPER exert a potent anti-HIV-1 specific**  
234 **cytotoxicity.**

235 Anti-HIV-1 antibodies neutralizing wide-spectrum of HIV-1 strains called broadly-  
236 neutralizing antibodies (bNAbs) have been developed or isolated from HIV-1-infected  
237 individuals. These antibodies are known to recognize diverse epitopes on HIV-1 envelope  
238 proteins to differing extents and are utilized for developing a variety of anti-HIV-1 CARs  
239 [47]. Prior to developing novel anti-HIV-1 CARs using bNAbs, we first tested whether  
240 previously reported anti-HIV-1 bNAbs can recognize HIV-1 envelope proteins expressed  
241 on cells (**Fig 4**).

242 We selected 10 different bNAbs based on their efficacies as well as a broad  
243 spectrum, including two different forms of antibody, conventional antibody and heavy-  
244 chain antibody [48, 49]. For CAR designing, the single-chain variable fragment (scFv)  
245 form or single-domain antibody (sdAb) form of these antibodies have been used..  
246 Therefore we developed the scFV or sdAb forms of these antibodies and assessed  
247 whether they can recognize HIV-1 envelope proteins expressed on cell surface by flow  
248 cytometry. A portion of epitope receptor of scFv or sdAb form was conjugated to a  
249 common human immunoglobulin G1 (IgG1) Fc domain—termed synthetic-antibody  
250 mimetics (SyAMs)—allowing for quantitative immunological assays. All SyAMs can be  
251 enriched at >95% purity, as determined by SDS-PAGE gel, using a protein-A column  
252 (**Figs 4B,C**). HXBC2 #39 clone induced with envelope expression for 10 days were used

253 for assessing the levels of epitope detection by those anti-HIV-1 SyAMs. Although epitope  
254 recognition differed between SyAMs, most were able to detect HXBC2 cells expressing  
255 HIV-1<sub>HXBC2</sub> envelope proteins.

256 Three scFv and six sdAb fragments were then subcloned into the CD4 $\zeta$  vector by  
257 replacement of the EGFP-P2A-CD4 fragment (**Fig 5A**). To improve CAR-T cell survival  
258 and their effector activities, all these CARs, including CD4 $\zeta$ , included the 41BB  
259 costimulatory signaling domain inserted between the CD8 transmembrane domain and  $\zeta$ -  
260 chain [50, 51]. To protect CAR-T cells from HIV-1 infection as well as virus production  
261 from proviral genes, all vectors included two anti-HIV-1 genes, C46 fusion inhibitor [52,  
262 53] and shRNA against the LTR R region (sh516) as reported previously [54, 55]. The  
263 C46 gene was selected as the best inhibitor for HIV-1 infection in comparison with three  
264 other inhibitors: shRNA against CCR5 (sh1005) [56, 57], V2o[58], and AP3[59] (**S2 Fig**).  
265 All of these CARs were successfully expressed in human primary T cells at similar levels  
266 (**Fig 5B**).

267 Anti-HIV-1-specific effector activity of each CAR was ranked by a cytotoxicity  
268 assay developed above using CD4 41BB $\zeta$  CAR as a reference CAR. To input the same  
269 number of effector cells in the assay, percent positivity of effector cells in each well was  
270 adjusted by unmodified mock T cells. 10E8 41BB $\zeta$  CAR showed near 2-fold higher activity  
271 than that of CD4 41BB $\zeta$  CAR. PGT128 and 3BNC117 41BB $\zeta$  CARs showed a weak to no  
272 detectable cytotoxicity. 10E8 and PGT128 41BB $\zeta$  CARs were further evaluated for  
273 cytokine production (**Fig 5D**). Compared to the no-CAR control (**Fig 5A, EGFP**), CD4+  
274 and CD8+ T cells modified with these CARs successfully produced cytokines in response  
275 to induced HXBC2 cells expressing HIV-1 envelope proteins. Interestingly, there was no

276 clear correlation between levels of cytokine production and induction of cytotoxicity;  
277 PGT128 CAR showed weaker effector activity than 10E8 CAR, but similar levels of IFN-  
278  $\gamma$  and TNF- $\alpha$ , both are well-known pro-inflammatory cytokines [60], production in both  
279 CD4 and CD8 T cells.

280 Lastly we tested sdAb-based CARs in the same way. Overall, slightly lower levels  
281 of gene marking were seen with these CARs (**Fig 6B**), probably due to the use of different  
282 assay methods between scFv and sdAb CARs (see **Materials and Methods**). As seen  
283 with 10E8 41BB $\zeta$  CAR, both MPER-specific sdAb-based CARs, 2H10 and 2E7, showed  
284 around 2-fold higher activity in comparison to that of CD4 41BB $\zeta$  CAR. Except J3 41BB $\zeta$   
285 CAR, the three other CARs (1F10, JM4, and 1H9) exhibited similar levels of effector  
286 activity in comparison to that of CD4 41BB $\zeta$  CAR (**Figs 6C,D**).

287

288 **Fig 4. Binding features of anti-HIV-1 broadly neutralizing antibodies (bNAbs) to HIV-**  
289 **1<sub>HXBC2</sub> envelope proteins expressed on HXBC2 #39 clone cells.**

290 **(A)** A list of anti-HIV-1 bNAbs used in this experiment. Recombinant forms of anti-HIV-1  
291 bNAbs were expressed in 293T cells as a fusion protein with the Fc portion of human  
292 IgG1 and purified by protein A column. scFv: single-chain variable fragment. sdAb: single-  
293 domain antibody. **(B,C)** HXBC2 #39 cells were cultured in the absence of DOX for 10  
294 days to induce HIV-1<sub>HXBC2</sub> envelope protein. One million cells were incubated with 1  $\mu$ g  
295 of each antibody on ice for 1 hour followed by APC-conjugated anti-human IgG Fc portion  
296 (red). Soluble CD4 Fc (sCD4) was used as a positive control and human IgG was used  
297 as a negative control. Uninduced HXBC2 #39 cells cultured in the presence of DOX were  
298 used to monitor non-specific antibody binding (blue).

299

300 **Fig 5. HIV-1-specific cytotoxicity mediated by anti-HIV-1 scFv CAR-T cells.**

301 **(A)** Schematic of anti-HIV-1 CAR structures expressed in lentiviral vectors. EGFP and  
302 CD4 $\zeta$  serve as negative and positive controls. CD4 41BB $\zeta$  CAR contains 4-1BB domain  
303 derived from human CD137. Three other CARs—10E8 41BB $\zeta$ , PGT128 41BB $\zeta$ , and  
304 3BNC117 41BB $\zeta$ —encode single-chain forms of anti-HIV-1 bNAbs. **(B)** Transduction  
305 levels of each anti-HIV-1 CAR were monitored by flow cytometry. EGFP, CD4 $\zeta$ , or CD4  
306 41BB $\zeta$  transduction were monitored by EGFP expression. Three anti-HIV-1 scFv CARs  
307 were detected by staining with Alexa488-conjugated anti-human Fc portion. **(C)**  
308 Comparison of the specific cytotoxicity induced by anti-HIV-1 CAR. Data represent the  
309 mean  $\pm$  standard deviation from triplicate wells. **(D)** Production of three different cytokines  
310 (IFN- $\gamma$ , IL-2, and TNF- $\alpha$ ) in CAR-modified CD4 and CD8 T cells was monitored by flow  
311 cytometry. Data were shown by % positivity of cytokine-producing cells.

312

313 **Fig 6. Superior anti-HIV-1 activity mediated by MPER-targeting anti-HIV-1 CAR.**

314 **(A)** A list of anti-HIV-1 sdAbs used for anti-HIV-1 CAR design. **(B)** Transduction levels of  
315 each anti-HIV-1 sdAb CAR were monitored by flow cytometry. Surface expression of anti-  
316 HIV-1 sdAb CARs was detected by biotinylated-protein L, followed by APC-conjugated  
317 streptavidin. **(C)** Comparison of specific cytotoxicity induced by anti-HIV-1 sdAb CARs.  
318 **(D)** Comparison of specific cytotoxicity induced by MPER-targeting anti-HIV-1 CARs.  
319 Data represent the mean  $\pm$  standard deviation from triplicate wells.

320

321 **Discussion**

322 In recent years, CAR technology has been extensively expanded as an HIV-1  
323 curative therapy [13, 15, 16, 26, 27, 47, 61-63]. Various anti-HIV-1 CARs targeting  
324 multiple different epitopes have been designed and evaluated their effector activities in  
325 vitro and in vivo systems (See review[47]). However the different assay systems easily  
326 generate conflicting conclusions even using the same source of antibody for CAR design  
327 [20, 27, 47, 64, 65]. To obtain highly reproducible result, we first selected single cell clones  
328 which can stably express HIV-1 envelope proteins over 7 days upon DOX removal from  
329 the culture medium, named HXBC2 #39. We eliminated HLA surface expression and  
330 minimized levels of CD4 surface expression, resulting in low levels of CAR-independent  
331 cytotoxicity mediated by mismatched HLA or CD4-dependent syncytium formation. As a  
332 result, this cell enabled assessment of HIV-1 specific effector activity even at low E:T  
333 ratios (**Fig 3E**). The combination with accurately countable multicolor flow cytometry  
334 allowed us to provide quantitative and reproducible results with wide-dynamic range and  
335 low background. Importantly, any residual background mediated by CAR-independent  
336 cytotoxicities can easily be compensated by using an appropriate range of E:T ratios.  
337 With this assay, we successfully ranked 9 newly designed anti-HIV-1 CARs targeting  
338 various regions of HIV-1 envelope proteins. Three CARs targeting the MPER of gp41  
339 showed approximately 2-fold higher activity than CARs targeting other regions of HIV-1  
340 envelope proteins (**Figs 5 and 6**). Importantly, these results were obtained from two  
341 different CAR backbones constructed by scFv (10E8) or sdAb (2E7 & 2H10), suggesting  
342 that the MPER can be a good target for designing anti-HIV-1 CAR or other anti-HIV-1  
343 biologics such as HIV-1 specific antibodies with effector activities.

344 In general, bNAbs targeting MPER are known to be more effective against broader  
345 range of HIV-1 strains but less effective and also display autoreactivity or polyreactivity  
346 [66, 67]. A similar observation was confirmed when the scFv form of 10E8 was tested for  
347 staining of HIV-1<sub>HXBC2</sub> envelope proteins expressed on HCBX2#39 cells (**Fig 4B**).  
348 Whereas we did not observe such negative features with our three MPER CARs; they  
349 showed more potent anti-HIV-1 effector activity than other CARs. Such difference may  
350 be caused by the different mechanisms of action between neutralization and effector  
351 activity mediated by CAR format.

352 Our assay is suitable to evaluate anti-HIV-1 effector activity against HIV-1<sub>HXBC2</sub>  
353 infection, and further validation is required against other virus strains. The bNAbs used  
354 here for designing anti-HIV-1 CARs are known to be effective against broad spectrum of  
355 HIV-1, and we expect that these CARs selected via our assay would be effective against  
356 other strains. Whereas one type of CAR would not be able to cover all HIV-1 species, the  
357 combination of two or three different anti-HIV-1 CAR molecules may be necessary to  
358 cover HIV-1 quasispecies within patients as used with the treatment by bNAbs. Since  
359 hundreds of anti-HIV-1 bNAbs are now been available for designing new CARs [68], our  
360 novel assay should be very powerful for selection of functional CAR molecules which  
361 cannot be identified by binding feature to epitope or neutralization activity. For further  
362 efficient CAR screening, it would be important to design additional target cells expressing  
363 more variety of HIV-1 envelope proteins, for example a CCR5 tropic HIV-1 strain. By  
364 marking other target cells with different fluorescent protein, we can assess multiple anti-  
365 HIV-1 CARs at the same time in the same assay system. CRISPR/Cas9 technology would  
366 be useful to modify the envelope sequence in HXBC2 #39 cells. It is also possible to



367 generate patient specific target cells with the same system. As such, our assay is able to  
368 proceed developing further effective anti-HIV-1 CARs even in a tailor made fashion.

369

## 370 **Materials and Methods**

371 **Cell preparation and culture.** Jurkat cells inducibly expressing envelope of HIV-1<sub>HXBC2</sub>  
372 (NIH AIDS Reagent: #3953) by the removal of doxycycline (DOX) from culture medium  
373 were used as a parental cell for an HIV-1 specific target cell (designated as HXBC2).  
374 Jurkat cells missing the envelope expression were used as a parental cell for non-target  
375 control (AIDS Reagent: #3954, designated as  $\Delta$ KS). The HLA-Class I expression of these  
376 cells were first eliminated by gene targeting of human- $\beta$ 2 microglobulin using  
377 CRISPR/Cas9 technology [69]. These cells were then genetically marked by fluorescent  
378 proteins, mCherry and TagBFP, respectively, to allow counting of absolute cell numbers  
379 of each populations by flow cytometry. HXBC2 cells were gene marked by two red  
380 fluorescent proteins for superior detection on MACSQuant analyzer 10 or MACSQuant  
381 VYB (MiltenyiBiotec). The cells were stained by anti-HLA-A,B,C antibody (W6/32,  
382 Biolegend) and anti-human CD4 antibody (RPA-T4, Biolegend), and populations with the  
383 double negative for HLA-A,B,C and CD4, but with the positive for mCherry or TagBFP  
384 were sorted out by the BD FACSAria II (BD Biosciences). Bulk sorted populations were  
385 further separated into single clone populations by a limiting dilution. Each clone was  
386 tested in an assay for induction of HIV-1<sub>HXBC2</sub> envelope expression as well as CD4 $\zeta$  CAR-  
387 induced cytotoxicity to confirm specificity and sensitivity for CAR-T inducing cytotoxicity.  
388 Absolute counts of the target and non-target cell populations were taken by MACSQuant  
389 and used to calculate relative cytotoxicity.

390 HXBC2 and  $\Delta$ KS cells were maintained in Iscove's Modified Dulbecco's Medium  
391 (IMDM) (Invitrogen) supplemented with 15% fetal bovine serum (FBS) (Omega Scientific),  
392 Antibiotic-Antimycotic (ThermoFisher Scientific), Glutamax (ThermoFisher Scientific),  
393 100  $\mu$ g/ml of Hygromycin B (ThermoFisher Scientific), 100  $\mu$ g/ml of Geneticin®  
394 (ThermoFisher Scientific), and 1  $\mu$ g/ml of DOX (D3072, Sigma-Aldrich). All cells were  
395 incubated at 37°C and 5% CO<sub>2</sub>.

396 A lentiviral vector encoding anti-HIV-1 CAR was transduced and expressed in the  
397 enriched total human T cells obtained from fresh peripheral blood mononuclear cells by  
398 negative selection (EasySep Human T cell isolation kit, Stemcell Technologies). CAR-T  
399 cells were maintained in IMDM supplemented with 20% FBS, 30 IU/ml IL-2 (R&D  
400 Systems), Glutamax, and Antibiotic-Antimycotic.

401 **Plasmid construction.** All vector plasmids were constructed by modifying the FG12  
402 vector [55, 70, 71]. For cell labeling with a fluorescent protein, the cDNAs encoding  
403 mCherry [72] or TagBFP [73] were chemically synthesized and cloned into the FG12-  
404 based vector under EF-1  $\alpha$  promoter, respectively (GenScript). Fusion inhibitors, C46 [52,  
405 53], V2o[58], and AP3[59] were also chemically synthesized based on the published  
406 sequences and cloned into the FG12 vector. A CRISPR/Cas9 lentiviral vector against  
407 human- $\beta$ 2 microglobulin was constructed by cloning an expression cassette for both Cas9  
408 and guide RNA (gRNA) of PX458 (Addgene #48138) into the FG12 vector. The target  
409 sequence of gRNA was 5'-GAGTAGCGCGAGCACAGCTA-3'. ScFv CARs joined with a  
410 41BB and CD3 $\zeta$  chain at the C-terminus using human IgG4 Fc portion as a spacer, were  
411 inserted into the FG12 vector by swapping with the sequence for CD4 $\zeta$ -P2A-EGFP [55,

412 74]. All CAR vectors contain two anti-HIV-1 genes, shRNA against HIV-1-LTR R region  
413 to protect CAR-T cells from HIV-1 infection [54, 55, 74] and C46 fusion inhibitor.

414 **Viruses.** All lentivirus vectors were produced in 293T cells using calcium phosphate–  
415 mediated transient transfection with a packing plasmid (pMDGL), the pRSV-Rev, and the  
416 pCMV-VSV-G envelope protein plasmid as previously described [55, 70, 71]. The  
417 integration-defective CRISPR/Cas9 vectors were produced using D64E packing plasmid  
418 [75]. HIV-1<sub>AD8</sub> and HIV-1<sub>BaL</sub> stocks were prepared and infected to human primary CD4+  
419 T cells as previously described [76].

420 **Flow-based cytotoxicity assay.** Assay details were summarized in **Fig 2A**. Briefly, each  
421 HXBC2 and ΔKS cell was seeded in the same well of round bottom 96-well-plates (#3879,  
422 Corning Costar) at a density of 10,000 cells/well in 100 μl of IMDM containing 20% FBS.  
423 Effector-T cells modified by anti-HIV-1 CAR or a control vector with different Effector-to-  
424 Target ratios (E:T) in the same volume of medium were added to the well and incubated  
425 at 37°C (total 200 μl/well). Fifty μl of culture was taken following incubation and fixed in  
426 the same volume of 2% formaldehyde/PBS. Absolute cell numbers from each population  
427 were analyzed on a MACSQuant Analyzer 10 (Miltenyi Biotec Inc.) using FlowJo  
428 (AshLand). Relative cytotoxicity was calculated as a percentage defined by the equation:  
429  $\text{Relative cytotoxicity} = 100 \times (1 - \text{target cell number} / \text{non target cell number})$ .

430 **SyAM production.** All the SyAM constructs were chemically synthesized based upon the  
431 public database information available from Los Alamos National Laboratory  
432 (<https://www.hiv.lanl.gov/components/sequence/HIV/neutralization/index.html>) and cloned into  
433 the FG12 lentiviral vector. SyAM expressing lentiviral vector was transduced to 293T cells  
434 at MOI 5. Cells were then cultured in IMDM supplemented with 7% ultra-low IgG FBS

435 (FB-06, Omega Scientific), Antibiotic-Antimycotic, and Glutamax for 4 days. Recombinant  
436 forms of SyAM in culture supernatant were isolated by protein A affinity resins  
437 (MabCapture, ThermoFisher Scientific) using Pierce gentle Ag/Ab elution buffer  
438 (ThermoFisher Scientific). After dialysis to PBS, SyAMs were concentrated approximately  
439 1 mg/ml with Amicon Ultra Centrifugal Filters (MWCO 30kDa, ThermoFisher Scientific)  
440 and stored in -80 °C freezer. Integrity and purify of SyAMs were assessed by SDS-PAGE  
441 analysis using 8-16 % gradient gel (Lonza).

442 **Western blot.** ΔKS and HXBC2 cells were cultured without DOX for 4 days to induce  
443 HIV-1 envelope protein expression. The same number of cells ( $2 \times 10^6$  cells) were lysed  
444 in 100 μl of 1% CHAPS/PBS and analyzed on 4-20% SDS-PAGE gel (Lonza). The  
445 envelope proteins were detected by 2F5 (specific for gp41, NIH reagent #1475), 2G12  
446 (specific for gp120, NIH reagent #1476), and horseradish peroxidase–conjugated  
447 antibody specific for human IgG (Santa Cruz Biotechnology, Dallas) as described  
448 previously [77].

449 **Immunofluorescent staining.** Cell surface expression of HIV-1<sub>HXBC2</sub> envelope proteins  
450 were detected as follows. One million HXBC2 #39 cells cultured in the absence of DOX  
451 for 10 days were incubated with recombinant sCD4 or SyAMs (1 μg each) on ice for 30  
452 min, followed by Alexa488- or APC-conjugated anti-human Fc antibody (Jackson  
453 ImmunoResearch Laboratories Inc.). The expression of each anti-HIV-1 CAR was  
454 detected by protein L-biotin (GenScript) and Alexa488-conjugated anti-human Fc  
455 antibody or APC-conjugated anti-human Fc antibody as described elsewhere [78].  
456 Antibodies for staining of intracellular cytokines, IFN-γ, TNF-α, and IL2, as well as human  
457 CD8 were purchased from Biolegend.

458 **HIV-1 specific T-cell proliferation assay.** CAR-T cell proliferation assay was performed  
459 as follows. HXBC2 #39 or  $\Delta$ KS #13 cells were cultured in the presence or absence of  
460 DOX for 10 days and co-cultured with CD4 $\zeta$  CAR-T cells pre-labeled with cell proliferation  
461 dye eFluor 670 according to the manufacture's instruction (ThermoFisher Scientific) in a  
462 24-well plate over 6 days at E:T ratio = 1:10. Levels of T-cell proliferation in eFluor 670  
463 positive population were monitored by a dye dilution assay using BD Fortessa and  
464 analyzed by FlowJo.

465 **Statistical analyses.** Results are expressed as mean  $\pm$  standard deviations (SDs). Errors  
466 depict SD. Statistical significance is presented with a *p*-value calculated via GraphPad  
467 Prism. The significance of survival-curve data was compared with a log-rank test. All other  
468 significance comparisons between groups were calculated by one-tailed unpaired *t*-test  
469 with Welch's correction.

470

## 471 **Acknowledgments**

472 We thank Jeffrey Brand for editing the manuscript.

473

## 474 **References**

- 475 1. Kochenderfer JN, Feldman SA, Zhao Y, Xu H, Black MA, Morgan RA, et al.  
476 Construction and preclinical evaluation of an anti-CD19 chimeric antigen receptor. *J*  
477 *Immunother.* 2009;32(7):689-702.
- 478 2. Ertl HC, Zaia J, Rosenberg SA, June CH, Dotti G, Kahn J, et al. Considerations for  
479 the clinical application of chimeric antigen receptor T cells: observations from a

- 480 recombinant DNA Advisory Committee Symposium held June 15, 2010. Cancer  
481 research. 2011;71(9):3175-81.
- 482 3. Kochenderfer JN, Rosenberg SA. Chimeric antigen receptor-modified T cells in CLL.  
483 The New England journal of medicine. 2011;365(20):1937-8; author reply 8.
- 484 4. Garfall AL, Stadtmauer EA, June CH. Chimeric Antigen Receptor T Cells in Myeloma.  
485 The New England journal of medicine. 2016;374(2):194.
- 486 5. Khan M, Mansoor AE, Olson AL. Prospects of chimeric antigen receptor T-cell and  
487 natural killer cell therapies in acute leukemias. Future Oncol. 2016;12(19):2179-82.
- 488 6. Ruella M, June CH. Chimeric Antigen Receptor T cells for B Cell Neoplasms: Choose  
489 the Right CAR for You. Curr Hematol Malig Rep. 2016;11(5):368-84.
- 490 7. Caruso HG, Torikai H, Zhang L, Maiti S, Dai J, Do KA, et al. Redirecting T-Cell  
491 Specificity to EGFR Using mRNA to Self-limit Expression of Chimeric Antigen  
492 Receptor. J Immunother. 2016;39(5):205-17.
- 493 8. O'Hara M, Stashwick C, Haas AR, Tanyi JL. Mesothelin as a target for chimeric  
494 antigen receptor-modified T cells as anticancer therapy. Immunotherapy.  
495 2016;8(4):449-60.
- 496 9. Ruella M, Kenderian SS, Shestova O, Fraietta JA, Qayyum S, Zhang Q, et al. The  
497 Addition of the BTK Inhibitor Ibrutinib to Anti-CD19 Chimeric Antigen Receptor T Cells  
498 (CART19) Improves Responses against Mantle Cell Lymphoma. Clinical cancer  
499 research : an official journal of the American Association for Cancer Research.  
500 2016;22(11):2684-96.

- 501 10. Ruella M, Levine BL. Smart CARs: optimized development of a chimeric antigen  
502 receptor (CAR) T cell targeting epidermal growth factor receptor variant III (EGFRvIII)  
503 for glioblastoma. *Ann Transl Med.* 2016;4(1):13.
- 504 11. Sakemura R, Terakura S, Watanabe K, Julamanee J, Takagi E, Miyao K, et al. A Tet-  
505 On Inducible System for Controlling CD19-Chimeric Antigen Receptor Expression  
506 upon Drug Administration. *Cancer immunology research.* 2016;4(8):658-68.
- 507 12. Turtle CJ, Riddell SR, Maloney DG. CD19-Targeted chimeric antigen receptor-  
508 modified T-cell immunotherapy for B-cell malignancies. *Clin Pharmacol Ther.*  
509 2016;100(3):252-8.
- 510 13. Zhen A, Peterson CW, Carrillo MA, Reddy SS, Youn CS, Lam BB, et al. Long-term  
511 persistence and function of hematopoietic stem cell-derived chimeric antigen  
512 receptor T cells in a nonhuman primate model of HIV/AIDS. *PLoS Pathog.*  
513 2017;13(12):e1006753.
- 514 14. Zhen A, Rezek V, Youn C, Rick J, Lam B, Chang N, et al. Stem-cell Based  
515 Engineered Immunity Against HIV Infection in the Humanized Mouse Model. *J Vis*  
516 *Exp.* 2016(113).
- 517 15. Kamata M, Kim PY, Ng HL, Ringpis GE, Kranz E, Chan J, et al. Ectopic expression  
518 of anti-HIV-1 shRNAs protects CD8(+) T cells modified with CD4zeta CAR from HIV-1  
519 infection and alleviates impairment of cell proliferation. *Biochemical and biophysical*  
520 *research communications.* 2015;463(3):216-21.
- 521 16. Zhen A, Kamata M, Rezek V, Rick J, Levin B, Kasparian S, et al. HIV-specific  
522 Immunity Derived From Chimeric Antigen Receptor-engineered Stem Cells.

- 523 Molecular therapy : the journal of the American Society of Gene Therapy.  
524 2015;23(8):1358-67.
- 525 17. Masiero S, Del Vecchio C, Gavioli R, Mattiuzzo G, Cusi MG, Micheli L, et al. T-cell  
526 engineering by a chimeric T-cell receptor with antibody-type specificity for the HIV-1  
527 gp120. *Gene Ther.* 2005;12(4):299-310.
- 528 18. Severino ME, Sarkis PT, Walker BD, Yang OO. Chimeric immune receptor T cells  
529 bypass class I requirements and recognize multiple cell types relevant in HIV-1  
530 infection. *Virology.* 2003;306(2):371-5.
- 531 19. Lin WY, Roberts MR. Developmental dissociation of T cells from B, NK, and myeloid  
532 cells revealed by MHC class II-specific chimeric immune receptors bearing TCR-zeta  
533 or FcR-gamma chain signaling domains. *Blood.* 2002;100(8):3045-8.
- 534 20. Yang OO, Tran AC, Kalams SA, Johnson RP, Roberts MR, Walker BD. Lysis of HIV-  
535 1-infected cells and inhibition of viral replication by universal receptor T cells. *Proc*  
536 *Natl Acad Sci U S A.* 1997;94(21):11478-83.
- 537 21. Tran AC, Zhang D, Byrn R, Roberts MR. Chimeric zeta-receptors direct human  
538 natural killer (NK) effector function to permit killing of NK-resistant tumor cells and  
539 HIV-infected T lymphocytes. *Journal of immunology.* 1995;155(2):1000-9.
- 540 22. Mitsuyasu R, Anton P, Deeks S, Scadden D, Connick E, Downs M, et al. Prolonged  
541 survival and tissue trafficking following adoptive transfer of CD4zeta gene-modified  
542 autologous CD4(+) and CD8(+) T cells in human immunodeficiency virus-infected  
543 subjects. *Blood.* 2000;96(3):785-93.



- 544 23. Walker R, Bechtel C, Natarajan V, Baseler M, Hege K, Metcalf J, et al. Long-term in  
545 vivo survival of receptor-modified syngeneic T cells in patients with human  
546 immunodeficiency virus infection. *Blood*. 2000;96(2):467-74.
- 547 24. Deeks S, Wagner B, Anton P, Mitsuyasu R, Scadden D, Huang C, et al. A phase II  
548 randomized study of HIV-specific T-cell gene therapy in subjects with undetectable  
549 plasma viremia on combination antiretroviral therapy. *Molecular Therapy*.  
550 2002;5(6):788-97.
- 551 25. Scholler J, Brady T, Binder-Scholl G, Hwang W, Plesa G, Hege K, et al. Decade-long  
552 safety and function of retroviral-modified chimeric antigen receptor T cells. *Science*  
553 *translational medicine*. 2012;4(132):132ra53.
- 554 26. Liu B, Zou F, Lu L, Chen C, He D, Zhang X, et al. Chimeric Antigen Receptor T Cells  
555 Guided by the Single-Chain Fv of a Broadly Neutralizing Antibody Specifically and  
556 Effectively Eradicate Virus Reactivated from Latency in CD4+ T Lymphocytes  
557 Isolated from HIV-1-Infected Individuals Receiving Suppressive Combined  
558 Antiretroviral Therapy. *Journal of virology*. 2016;90(21):9712-24.
- 559 27. Ali A, Kitchen SG, Chen ISY, Ng HL, Zack JA, Yang OO. HIV-1-Specific Chimeric  
560 Antigen Receptors Based on Broadly Neutralizing Antibodies. *Journal of virology*.  
561 2016;90(15):6999-7006.
- 562 28. Kumar R, Kumari R, Khan L, Sankhyan A, Parray HA, Tiwari A, et al. Isolation and  
563 Characterization of Cross-Neutralizing Human Anti-V3 Single-Chain Variable  
564 Fragments (scFvs) Against HIV-1 from an Antigen Preselected Phage Library. *Appl*  
565 *Biochem Biotechnol*. 2019;187(3):1011-27.

- 566 29. Anthony-Gonda K, Bardhi A, Ray A, Flerin N, Li M, Chen W, et al. Multispecific anti-  
567 HIV duoCAR-T cells display broad in vitro antiviral activity and potent in vivo  
568 elimination of HIV-infected cells in a humanized mouse model. *Science translational*  
569 *medicine*. 2019;11(504).
- 570 30. Brunner KT, Mauel J, Cerottini JC, Chapuis B. Quantitative assay of the lytic action  
571 of immune lymphoid cells on 51-Cr-labelled allogeneic target cells in vitro; inhibition  
572 by isoantibody and by drugs. *Immunology*. 1968;14(2):181-96.
- 573 31. Burkett MW, Shafer-Weaver KA, Strobl S, Baseler M, Malyguine A. A novel flow  
574 cytometric assay for evaluating cell-mediated cytotoxicity. *J Immunother*.  
575 2005;28(4):396-402.
- 576 32. Godoy-Ramirez K, Makitalo B, Thorstensson R, Sandstrom E, Biberfeld G, Gaines  
577 H. A novel assay for assessment of HIV-specific cytotoxicity by multiparameter flow  
578 cytometry. *Cytometry A*. 2005;68(2):71-80.
- 579 33. Kasatori N, Ishikawa F, Ueyama M, Urayama T. A differential assay of NK-cell-  
580 mediated cytotoxicity in K562 cells revealing three sequential membrane impairment  
581 steps using three-color flow-cytometry. *J Immunol Methods*. 2005;307(1-2):41-53.
- 582 34. Zimmermann SY, Esser R, Rohrbach E, Klingebiel T, Koehl U. A novel four-colour  
583 flow cytometric assay to determine natural killer cell or T-cell-mediated cellular  
584 cytotoxicity against leukaemic cells in peripheral or bone marrow specimens  
585 containing greater than 20% of normal cells. *J Immunol Methods*. 2005;296(1-2):63-  
586 76.

- 587 35. Zomerdijk JC, Kieft R, Shiels PG, Borst P. Alpha-amanitin-resistant transcription units  
588 in trypanosomes: a comparison of promoter sequences for a VSG gene expression  
589 site and for the ribosomal RNA genes. *Nucleic acids research*. 1991;19(19):5153-8.
- 590 36. Zaritskaya L, Shafer-Weaver KA, Gregory MK, Strobl SL, Baseler M, Malyguine A.  
591 Application of a flow cytometric cytotoxicity assay for monitoring cancer vaccine trials.  
592 *J Immunother*. 2009;32(2):186-94.
- 593 37. Devlin LA, Haughton DJ, Crockard AD, Edgar JD. Natural killer cell cytotoxicity in  
594 patients with recurrent herpes infections: diagnostic utility of a flow cytometric assay.  
595 *J Clin Pathol*. 2010;63(3):244-8.
- 596 38. Ozdemir O. Flow cytometric mast cell-mediated cytotoxicity assay: a three-color flow  
597 cytometric approach using monoclonal antibody staining with annexin V/propidium  
598 iodide co-labeling to assess human mast cell-mediated cytotoxicity by fluorosphere-  
599 adjusted counts. *J Immunol Methods*. 2011;365(1-2):166-73.
- 600 39. Jang YY, Cho D, Kim SK, Shin DJ, Park MH, Lee JJ, et al. An improved flow  
601 cytometry-based natural killer cytotoxicity assay involving calcein AM staining of  
602 effector cells. *Ann Clin Lab Sci*. 2012;42(1):42-9.
- 603 40. Thakur A, Zaman A, Hummel J, Jones K, Hortelano G. Single-colour flow cytometric  
604 assay to determine NK cell-mediated cytotoxicity and viability against non-adherent  
605 human tumor cells. *Biotechnol Lett*. 2012;34(3):447-53.
- 606 41. Mhatre S, Madkaikar M, Ghosh K, Desai M, Pujari V, Gupta M. Rapid flow cytometry  
607 based cytotoxicity assay for evaluation of NK cell function. *Indian J Exp Biol*.  
608 2014;52(10):983-8.

- 609 42. Gillissen MA, Yasuda E, de Jong G, Levie SE, Go D, Spits H, et al. The modified  
610 FACS calcein AM retention assay: A high throughput flow cytometer based method  
611 to measure cytotoxicity. *J Immunol Methods*. 2016;434:16-23.
- 612 43. Wang D, Quan Y, Yan Q, Morales JE, Wetsel RA. Targeted Disruption of the beta2-  
613 Microglobulin Gene Minimizes the Immunogenicity of Human Embryonic Stem Cells.  
614 *Stem cells translational medicine*. 2015;4(10):1234-45.
- 615 44. Lifson JD, Feinberg MB, Reyes GR, Rabin L, Banapour B, Chakrabarti S, et al.  
616 Induction of CD4-dependent cell fusion by the HTLV-III/LAV envelope glycoprotein.  
617 *Nature*. 1986;323(6090):725-8.
- 618 45. Cao J, Park IW, Cooper A, Sodroski J. Molecular determinants of acute single-cell  
619 lysis by human immunodeficiency virus type 1. *Journal of virology*. 1996;70(3):1340-  
620 54.
- 621 46. Swearingen KE, Loomis WP, Kehimkar B, Cookson BT, Dovichi NJ. Quantification of  
622 green fluorescent protein in cellular supernatant by capillary electrophoresis with  
623 laser-induced fluorescence detection for measurement of cell death. *Talanta*.  
624 2010;81(3):948-53.
- 625 47. Hale M, Mesojednik T, Romano Ibarra GS, Sahni J, Bernard A, Sommer K, et al.  
626 Engineering HIV-Resistant, Anti-HIV Chimeric Antigen Receptor T Cells. *Molecular*  
627 *therapy : the journal of the American Society of Gene Therapy*. 2017;25(3):570-9.
- 628 48. Strokappe N, Szynol A, Aasa-Chapman M, Gorlani A, Forsman Quigley A, Hulsik DL,  
629 et al. Llama antibody fragments recognizing various epitopes of the CD4bs neutralize  
630 a broad range of HIV-1 subtypes A, B and C. *PLoS One*. 2012;7(3):e33298.

- 631 49. Strokappe N, Szynol A, Aasa-Chapman M, Gorlani A, Forsman Quigley A, Hulsik D,  
632 et al. Llama antibody fragments recognizing various epitopes of the CD4bs neutralize  
633 a broad range of HIV-1 subtypes A, B and C. *PloS One*. 2012;7(3):e33298.
- 634 50. Song DG, Ye Q, Carpenito C, Poussin M, Wang LP, Ji C, et al. In vivo persistence,  
635 tumor localization, and antitumor activity of CAR-engineered T cells is enhanced by  
636 costimulatory signaling through CD137 (4-1BB). *Cancer research*.  
637 2011;71(13):4617-27.
- 638 51. Milone MC, Fish JD, Carpenito C, Carroll RG, Binder GK, Teachey D, et al. Chimeric  
639 receptors containing CD137 signal transduction domains mediate enhanced survival  
640 of T cells and increased antileukemic efficacy in vivo. *Molecular therapy : the journal*  
641 *of the American Society of Gene Therapy*. 2009;17(8):1453-64.
- 642 52. Wolstein O, Boyd M, Millington M, Impey H, Boyer J, Howe A, et al. Preclinical safety  
643 and efficacy of an anti-HIV-1 lentiviral vector containing a short hairpin RNA to CCR5  
644 and the C46 fusion inhibitor. *Molecular Therapy-Methods & Clinical Development*.  
645 2014;1:11.
- 646 53. Hermann F, Egerer L, Brauer F, Gerum C, Schwalbe H, Dietrich U, et al. Mutations  
647 in gp120 contribute to the resistance of human immunodeficiency virus type 1 to  
648 membrane-anchored C-peptide maC46. *Journal of Virology*. 2009;83(10):4844-53.
- 649 54. Ringpis G, Shimizu S, Arokium H, Camba-Colón J, Carroll M, Cortado R, et al.  
650 Engineering HIV-1-resistant T-cells from short-hairpin RNA-expressing  
651 hematopoietic stem/progenitor cells in humanized BLT mice. *PLoS One*.  
652 2012;7(12):e53492.

- 653 55. Kamata M, Kim P, Ng H, Ringpis G, Kranz E, Chan J, et al. Ectopic expression of  
654 anti-HIV-1 shRNAs protects CD8<sup>+</sup> T cells modified with CD4 $\zeta$  CAR from HIV-1  
655 infection and alleviates impairment of cell proliferation. *Biochemical and biophysical*  
656 *research communications*. 2015;463(3):216-21.
- 657 56. An D, Donahue R, Kamata M, Poon B, Metzger M, Mao S, et al. Stable reduction of  
658 CCR5 by RNAi through hematopoietic stem cell transplant in non-human primates.  
659 *Proc Natl Acad Sci U S A*. 2007;104(32):13110-5.
- 660 57. Shimizu S, Kamata M, Kittipongdaja P, Chen K, Kim S, Pang S, et al.  
661 Characterization of a potent non-cytotoxic shRNA directed to the HIV-1 co-receptor  
662 CCR5. *Genetic Vaccines and Therapy*. 2009;7:8.
- 663 58. Brauer F, Schmidt K, Zahn RC, Richter C, Radeke HH, Schmitz JE, et al. A rationally  
664 engineered anti-HIV peptide fusion inhibitor with greatly reduced immunogenicity.  
665 *Antimicrob Agents Chemother*. 2013;57(2):679-88.
- 666 59. Zhu X, Zhu Y, Ye S, Wang Q, Xu W, Su S, et al. Improved Pharmacological and  
667 Structural Properties of HIV Fusion Inhibitor AP3 over Enfuvirtide: Highlighting  
668 Advantages of Artificial Peptide Strategy. *Sci Rep*. 2015;5:13028.
- 669 60. Shimabukuro-Vornhagen A, Godel P, Subklewe M, Stemmler HJ, Schlosser HA,  
670 Schlaak M, et al. Cytokine release syndrome. *Journal for immunotherapy of cancer*.  
671 2018;6(1):56.
- 672 61. Leibman RS, Richardson MW, Ellebrecht CT, Maldini CR, Glover JA, Secreto AJ, et  
673 al. Supraphysiologic control over HIV-1 replication mediated by CD8 T cells  
674 expressing a re-engineered CD4-based chimeric antigen receptor. *PLoS Pathog*.  
675 2017;13(10):e1006613.

- 676 62. Liu D, Tian S, Zhang K, Xiong W, Lubaki NM, Chen Z, et al. Chimeric antigen receptor  
677 (CAR)-modified natural killer cell-based immunotherapy and immunological synapse  
678 formation in cancer and HIV. *Protein & cell*. 2017;8(12):861-77.
- 679 63. Liu L, Patel B, Ghanem MH, Bundoc V, Zheng Z, Morgan RA, et al. Novel CD4-Based  
680 Bispecific Chimeric Antigen Receptor Designed for Enhanced Anti-HIV Potency and  
681 Absence of HIV Entry Receptor Activity. *Journal of virology*. 2015;89(13):6685-94.
- 682 64. Roberts M, Qin L, Zhang D, Smith D, Tran A, Dull T, et al. Targeting of human  
683 immunodeficiency virus-infected cells by CD8+ T lymphocytes armed with universal  
684 T-cell receptors. *Blood*. 1994;84(9):2878-89.
- 685 65. Hege KM, Cooke KS, Finer MH, Zsebo KM, Roberts MR. Systemic T cell-  
686 independent tumor immunity after transplantation of universal receptor-modified  
687 bone marrow into SCID mice. *The Journal of experimental medicine*.  
688 1996;184(6):2261-9.
- 689 66. Zhang R, Verkoczy L, Wiehe K, Munir Alam S, Nicely NI, Santra S, et al. Initiation of  
690 immune tolerance-controlled HIV gp41 neutralizing B cell lineages. *Science*  
691 *translational medicine*. 2016;8(336):336ra62.
- 692 67. Sok D, Burton DR. Recent progress in broadly neutralizing antibodies to HIV. *Nature*  
693 *immunology*. 2018;19(11):1179-88.
- 694 68. Yoon H, Macke J, West AP, Jr., Foley B, Bjorkman PJ, Korber B, et al. CATNAP: a  
695 tool to compile, analyze and tally neutralizing antibody panels. *Nucleic acids research*.  
696 2015;43(W1):W213-9.

- 697 69. Yan M, Wen J, Liang M, Lu Y, Kamata M, Chen IS. Modulation of Gene Expression  
698 by Polymer Nanocapsule Delivery of DNA Cassettes Encoding Small RNAs. *PLoS*  
699 *One*. 2015;10(6):e0127986.
- 700 70. Kamata M, Liu S, Liang M, Nagaoka Y, Chen I. Generation of human induced  
701 pluripotent stem cells bearing an anti-HIV transgene by a lentiviral vector carrying an  
702 internal murine leukemia virus promoter. *Human gene therapy*. 2010;21(11):1555-  
703 67.
- 704 71. Kamata M, Liang M, Liu S, Nagaoka Y, Chen I. Live cell monitoring of hiPSC  
705 generation and differentiation using differential expression of endogenous  
706 microRNAs. *PLoS One*. 2010;5(7):e11834.
- 707 72. Shu X, Shaner NC, Yarbrough CA, Tsien RY, Remington SJ. Novel chromophores  
708 and buried charges control color in mFruits. *Biochemistry*. 2006;45(32):9639-47.
- 709 73. Chai Y, Li W, Feng G, Yang Y, Wang X, Ou G. Live imaging of cellular dynamics  
710 during *Caenorhabditis elegans* postembryonic development. *Nat Protoc*.  
711 2012;7(12):2090-102.
- 712 74. Zhen A, Kamata M, Rezek V, Rick J, Levin B, Kasparian S, et al. HIV-specific  
713 immunity derived from chimeric antigen receptor-engineered stem cells. *Molecular*  
714 *Therapy*. 2015;23(8):1358-67.
- 715 75. Poon B, Chen IS. Human immunodeficiency virus type 1 (HIV-1) Vpr enhances  
716 expression from unintegrated HIV-1 DNA. *J Virol*. 2003;77(7):3962-72.
- 717 76. Ringpis GE, Shimizu S, Arokium H, Camba-Colon J, Carroll MV, Cortado R, et al.  
718 Engineering HIV-1-resistant T-cells from short-hairpin RNA-expressing



719 hematopoietic stem/progenitor cells in humanized BLT mice. PLoS One.  
720 2012;7(12):e53492.

721 77. Kamata M, Watanabe N, Nagaoka Y, Chen I. Human immunodeficiency virus type 1  
722 Vpr binds to the N lobe of the Wee1 kinase domain and enhances kinase activity for  
723 CDC2. Journal of Virology. 2008;82(12):5672-82.

724 78. Zheng Z, Chinnasamy N, Morgan RA. Protein L: a novel reagent for the detection of  
725 chimeric antigen receptor (CAR) expression by flow cytometry. Journal of  
726 translational medicine. 2012;10:29.

727

## 728 **Supporting information**

729 **S1 Fig. CRISPR-mediated knockout of HLA-I A,B,C surface expression via gene-**  
730 **editing of human- $\beta$ 2 microglobulin.**

731 **(A)** Schematic of a lentiviral vector encoding Cas9 together under CMV promoter (CMV)  
732 with single guide RNA (sgRNA). The vector has an FG12-derived backbone possessing  
733 a self-inactivating LTR, a central polypurine tract (cPPT), and a mutant Woodchuck  
734 Hepatitis Virus Posttranscriptional Regulatory Element (WPRE). T2A: self-cleaving 2A  
735 peptide of *Thosea asigna*. EGFP fused with Cas9 via T2A peptide (SpCas9-T2A-EGFP)  
736 serves as a transduction marker. sgRNA: specific for human- $\beta$ 2 microglobulin ( $\beta$ 2MG)  
737 (5'-GAGTAGCGCGAGCACAGCTA-3') under the human U6 RNA pol III promoter (U6).

738 **(B)** Jurkat cells without ( $\Delta$ KS) or with inducibly expressing HIV-1<sub>HXB2</sub> envelope proteins  
739 (HXB2) were transduced with a non-integrating lentiviral vector encoding Cas9 together  
740 with  $\beta$ 2MG sgRNA, which contain integrase with a D64E mutation. These cells were  
741 stained with PE-conjugated anti-human HLA-I A,B,C antibody.

742

743 **S2 Fig. Comparison of anti-HIV-1 gene products against HIV-1 infections.**

744 **(A)** Schematic of a lentiviral vector encoding anti-HIV-1 chimeric antigen receptor (CAR)  
745 under the murine stem cell virus promoter (MSCV). The vector has an FG12-derived  
746 backbone possessing a self-inactivating LTR, a central polypurine tract (cPPT), and a  
747 mutant Woodchuck Hepatitis Virus Posttranscriptional Regulatory Element (WPRE).  
748 Dual: the vector encoding EGFP together with two anti-HIV-1 genes, sh516 targeting HIV-  
749 1 LTR R region under 7SK promoter (7SK) [76] and three different fusion inhibitors (V2o,  
750 AP3, or C46) under EF1- $\alpha$  promoter (EF1 $\alpha$ ) or sh1005 under H1 promoter[56]. **(B)** Human  
751 primary CD4<sup>+</sup> T cells were positively selected by anti-human CD4 magnetic beads. Cells  
752 were stimulated by anti-CD3/CD28 antibodies (1  $\mu$ g/ml each) for 24 hours in the presence  
753 of 30 IU/ml of human IL-2 and transduced with above vectors. EGFP-positive populations  
754 were enriched by FACS Aria II on day 3 post-vector transduction and infected by two  
755 different HIV-1 strains—HIV-1<sub>NL4-3</sub> or HIV-1<sub>NFN-SX</sub>—at 100ng of HIV-1 p24 per one million  
756 cells. HIV-1 p24 amounts in culture supernatant were titrated 6 days post-HIV-1 challenge.  
757 Mock: non-lentiviral vector transduced cells.

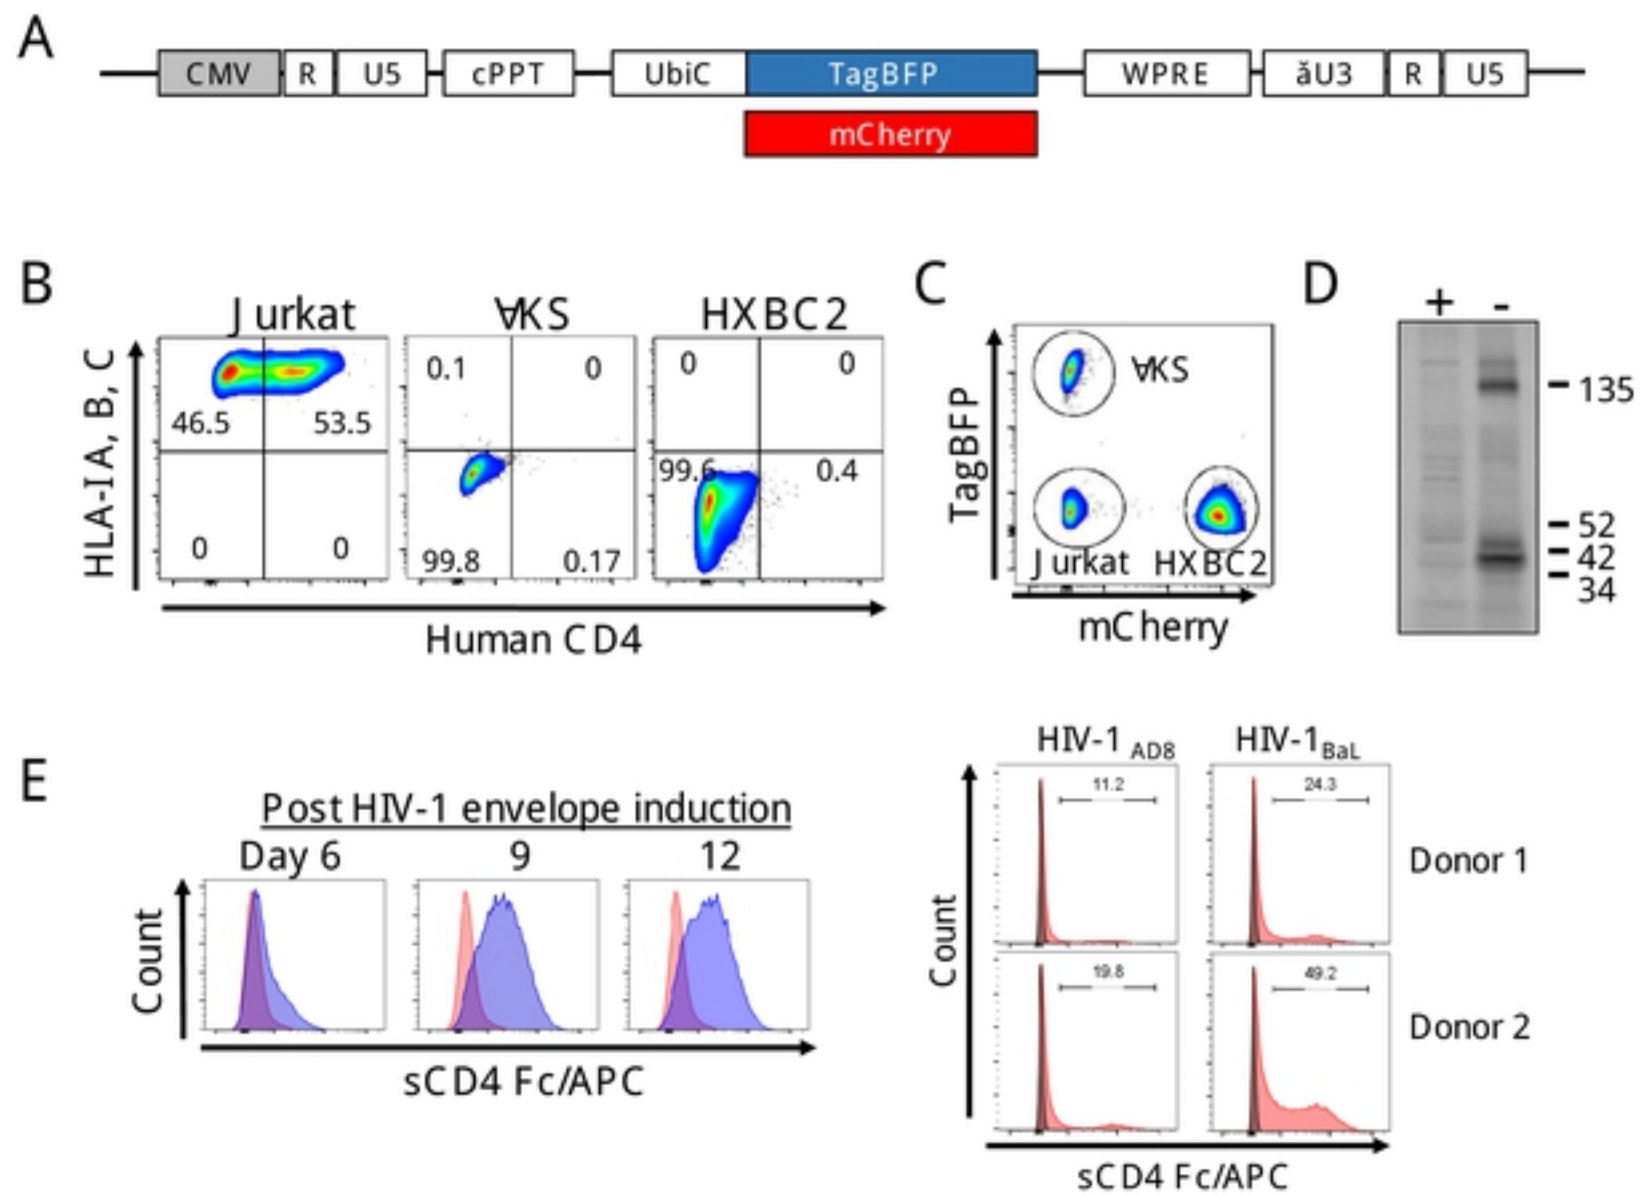

Fig 1

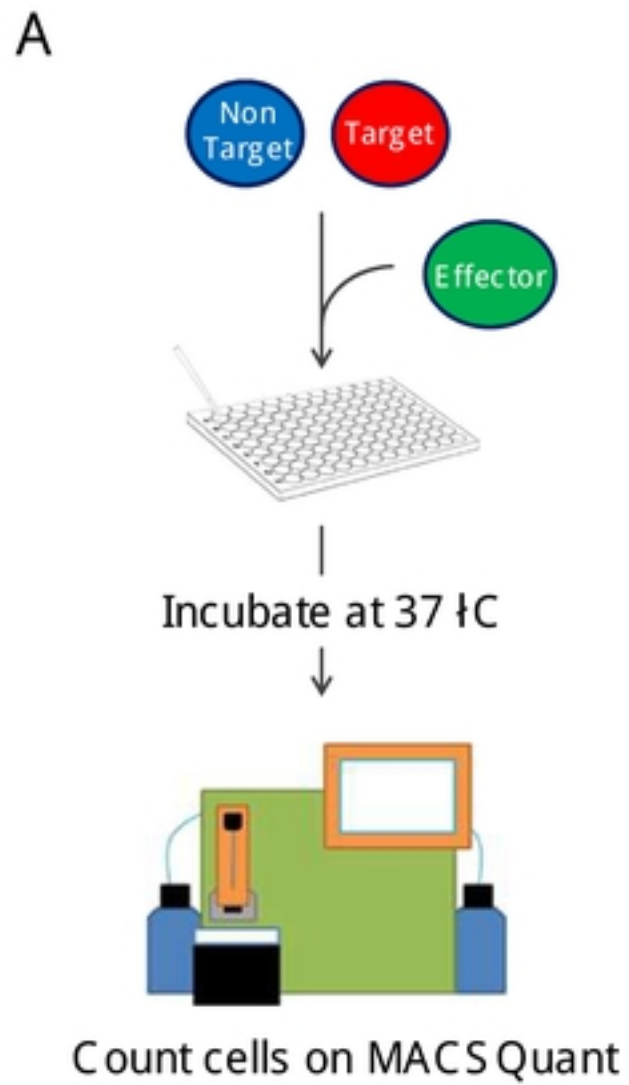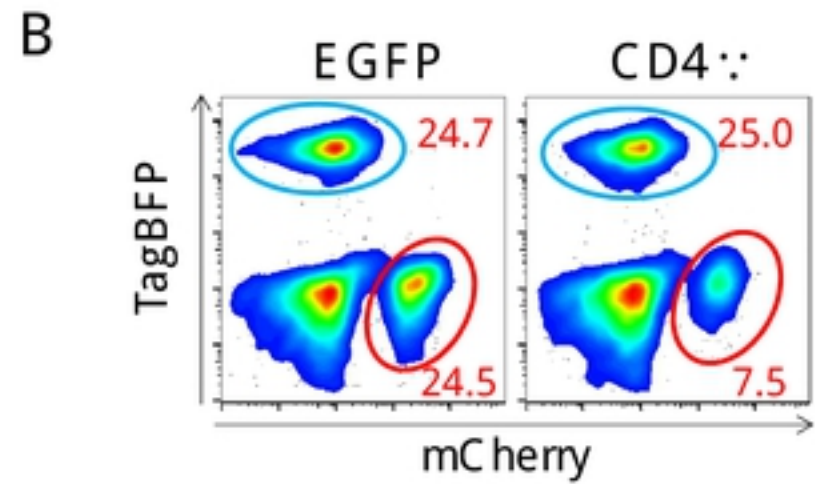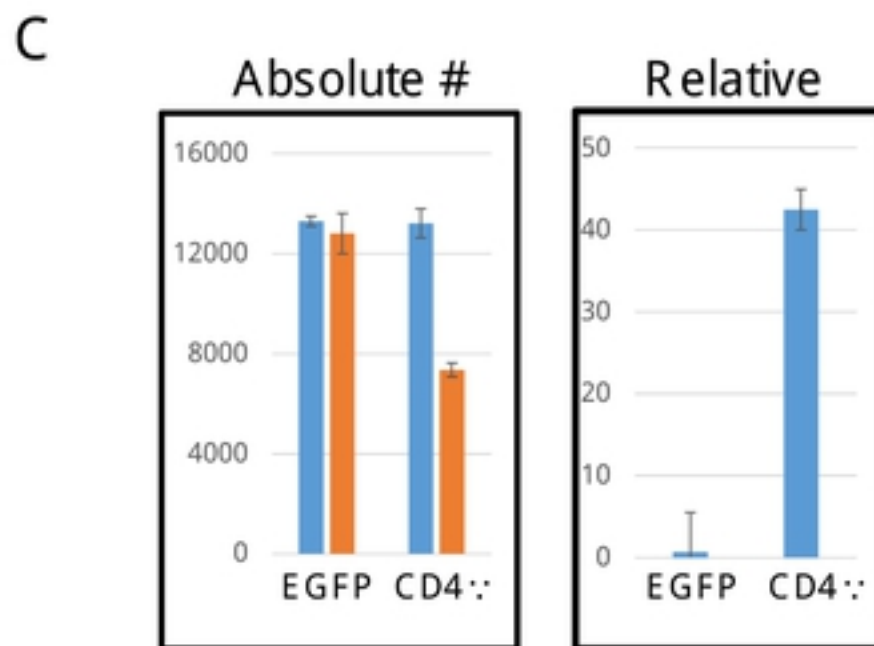

Fig 2

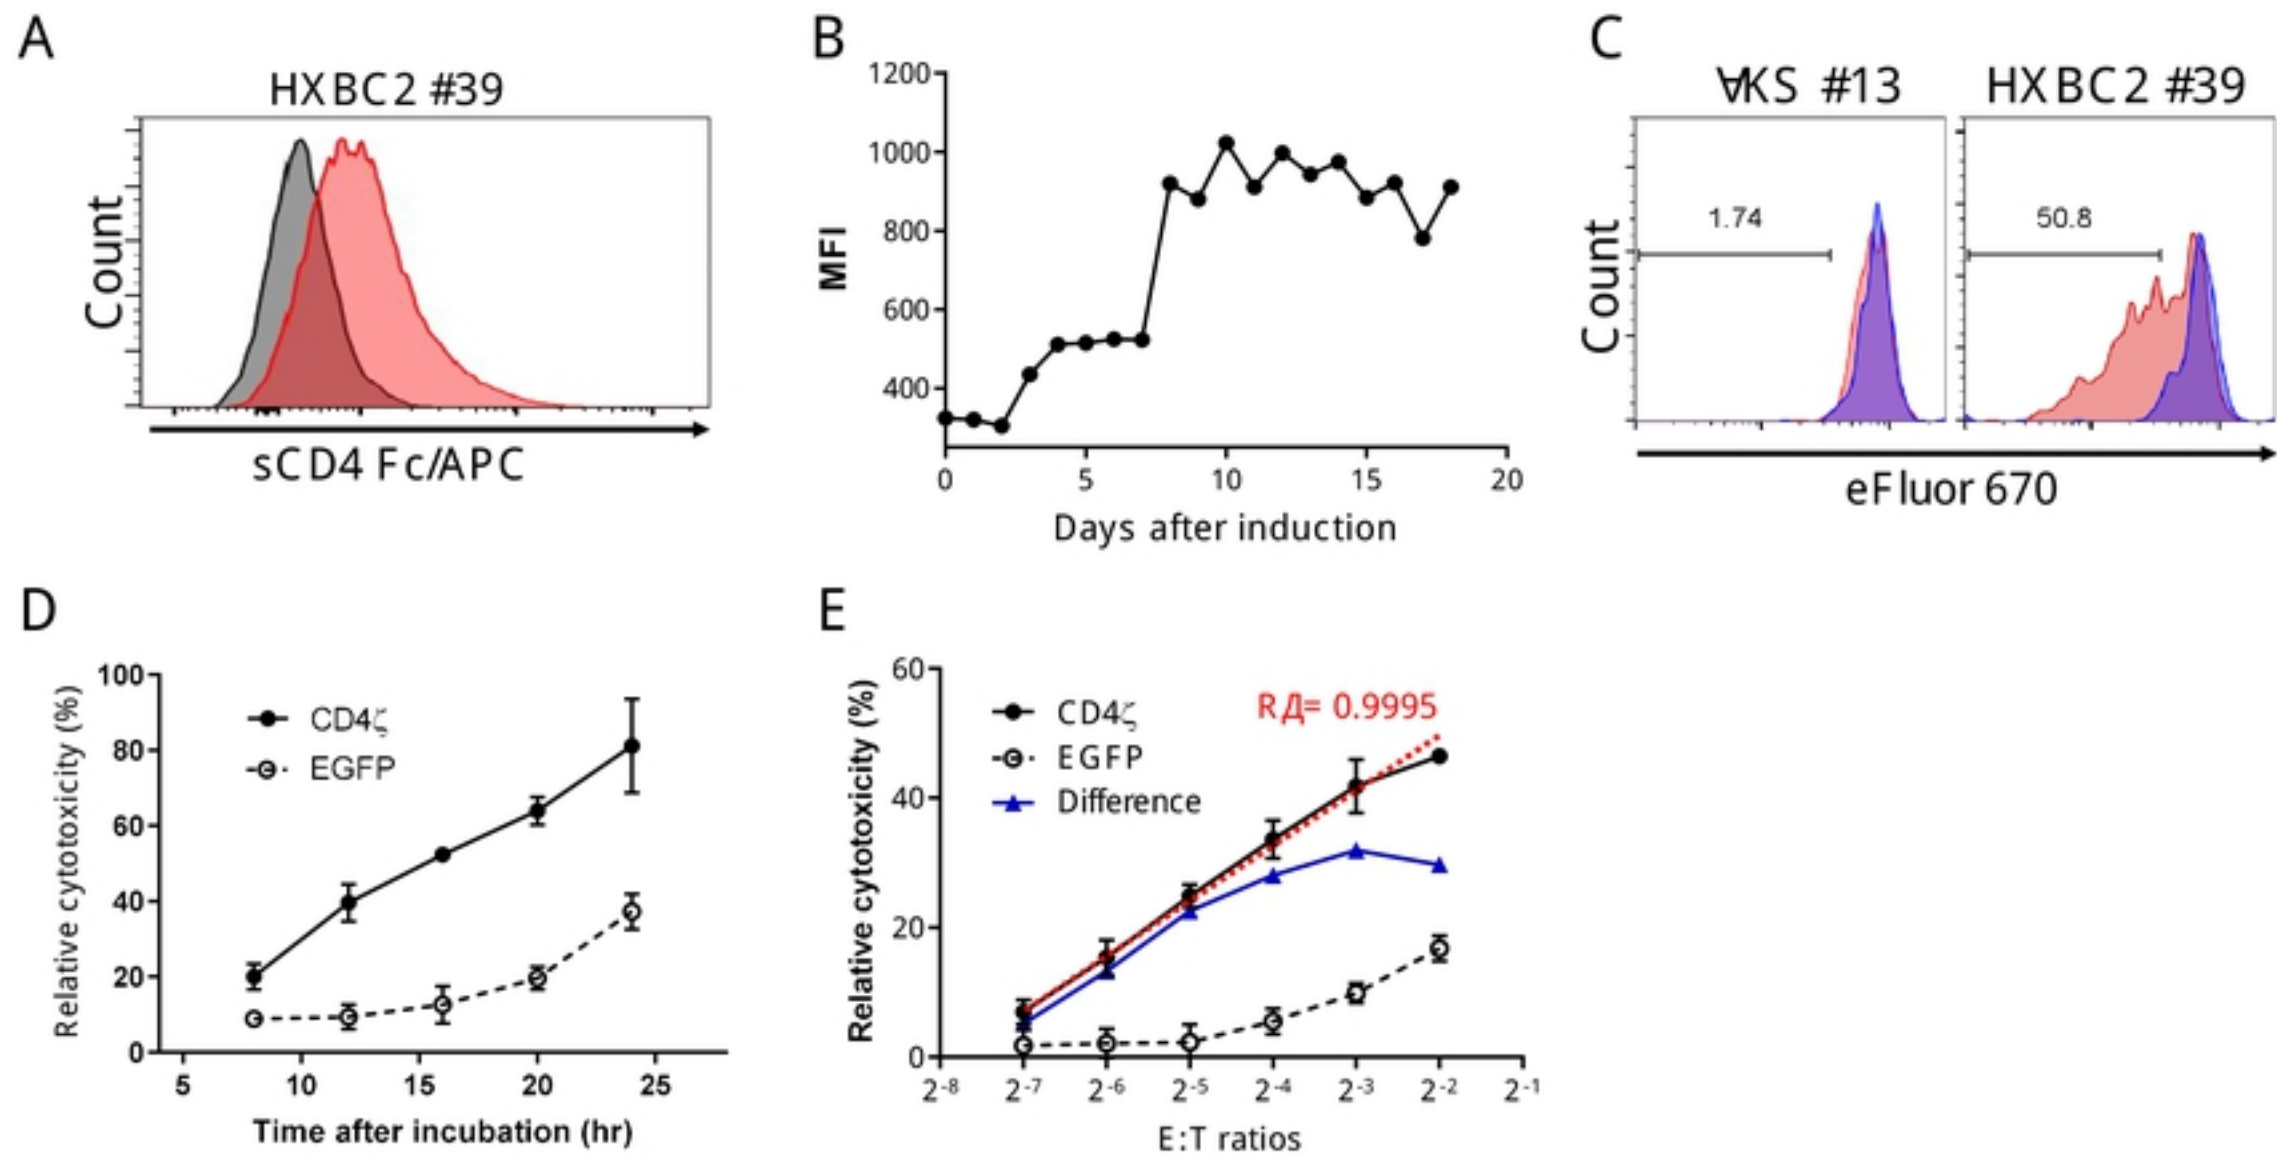

Fig 3

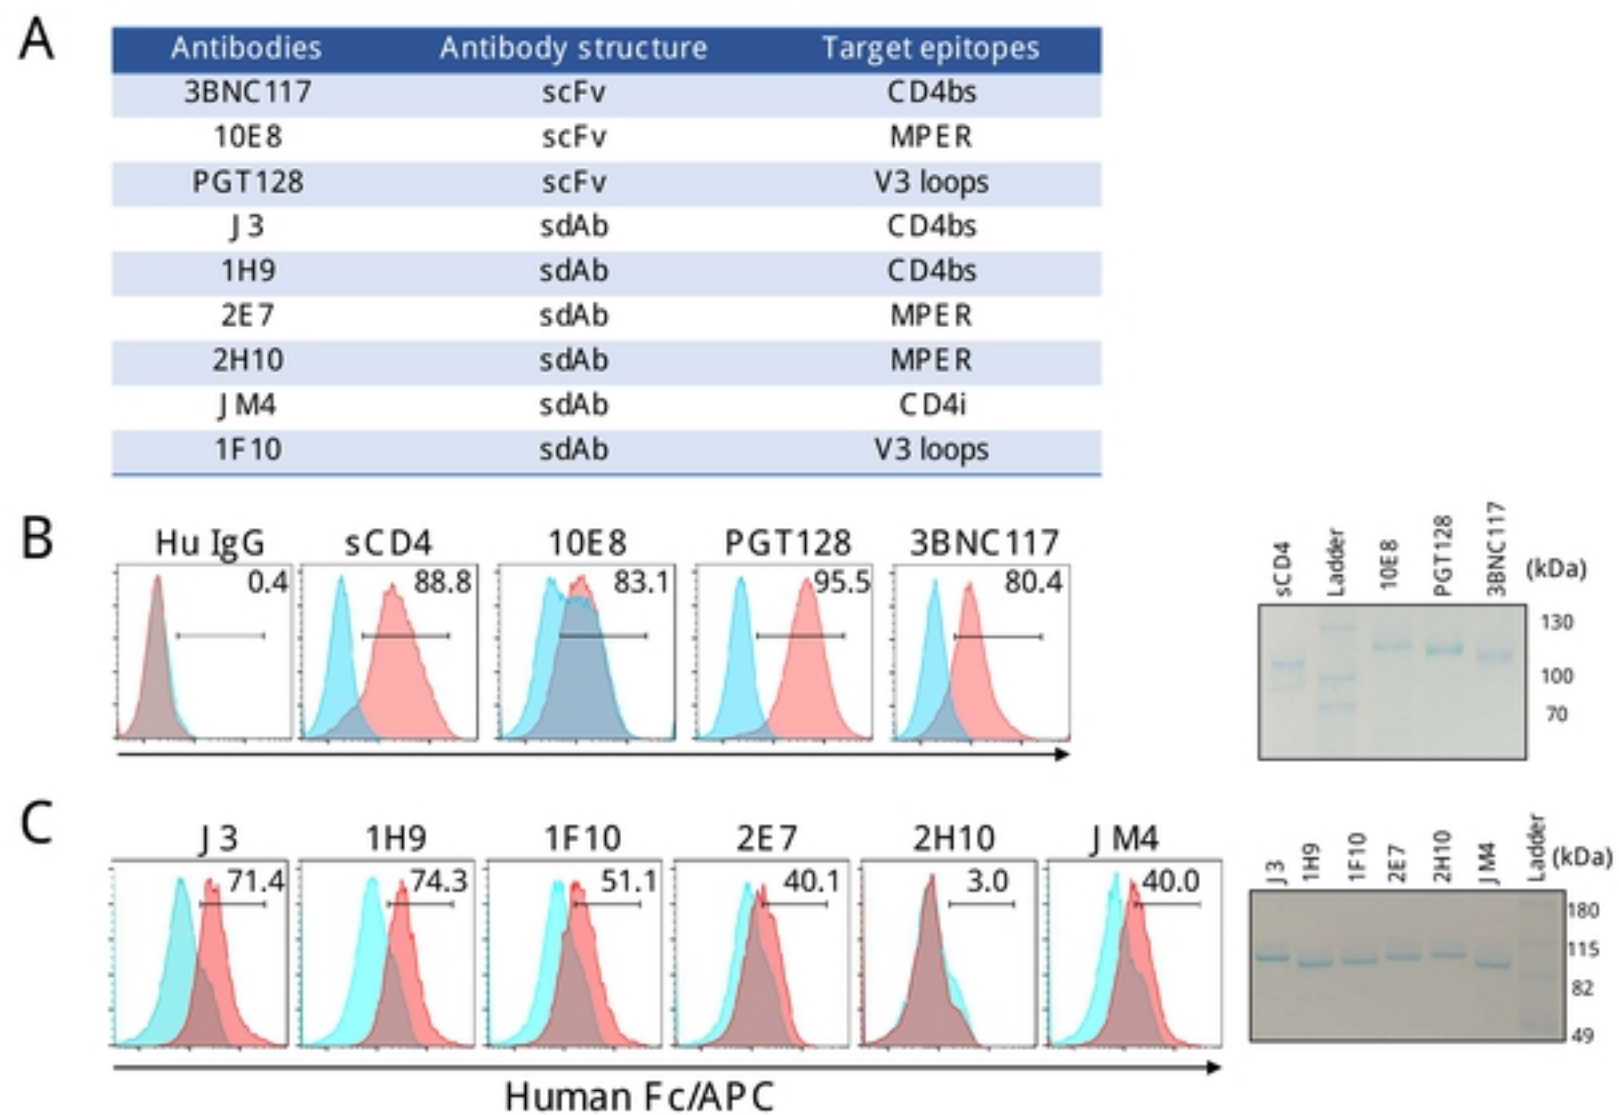

Fig 4

A

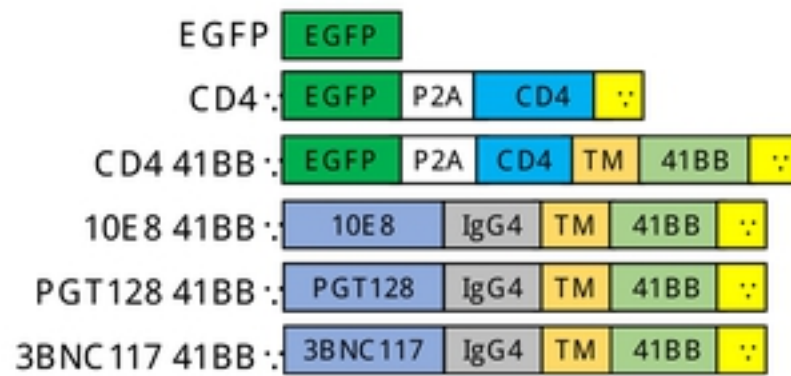

B

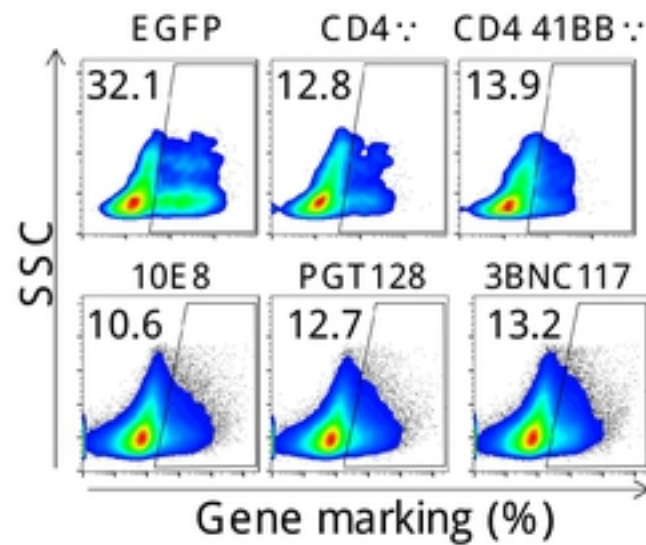

C

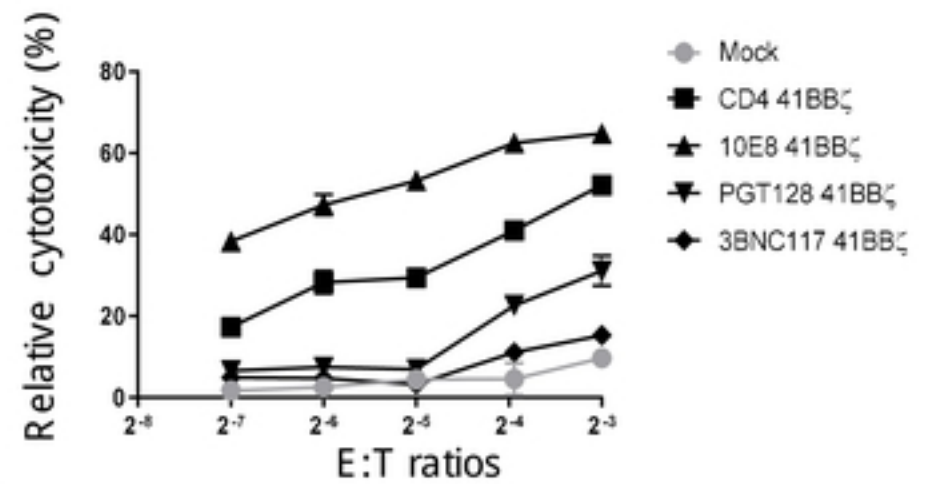

D

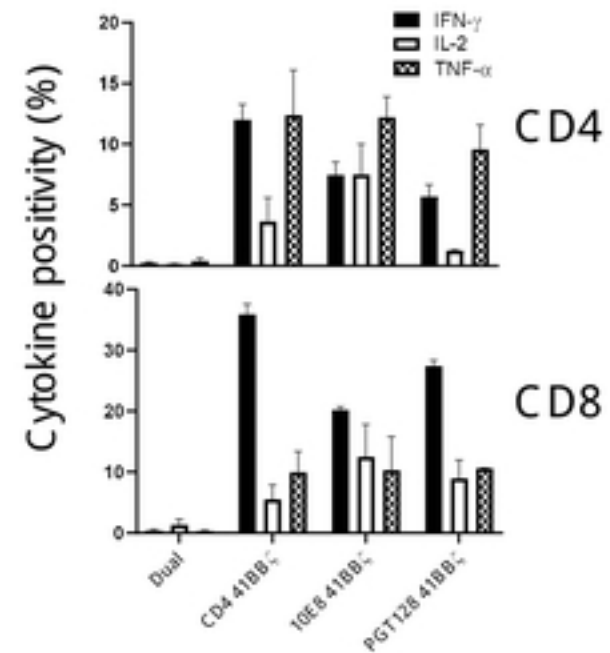

Fig 5

A

| sdAbs | Targets |
|-------|---------|
| J3    | CD4bs   |
| 1H9   | CD4bs   |
| 2E7   | MPER    |
| 2H10  | MPER    |
| JM4   | CD4i    |
| 1F10  | V3 Loop |

B

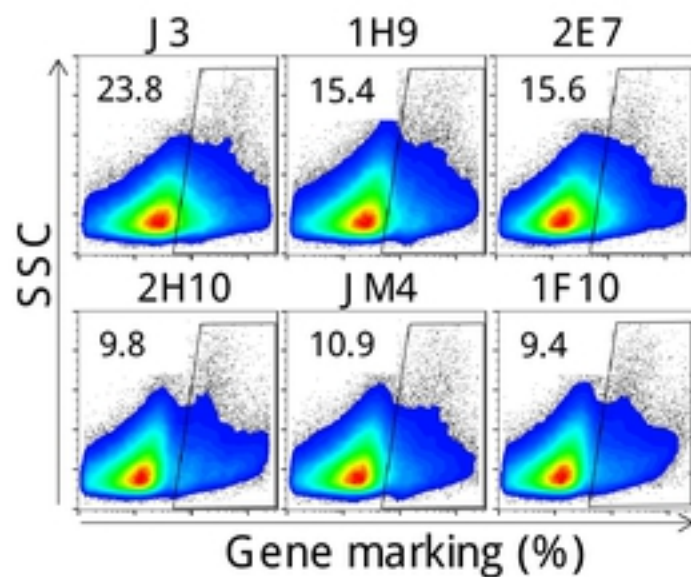

C

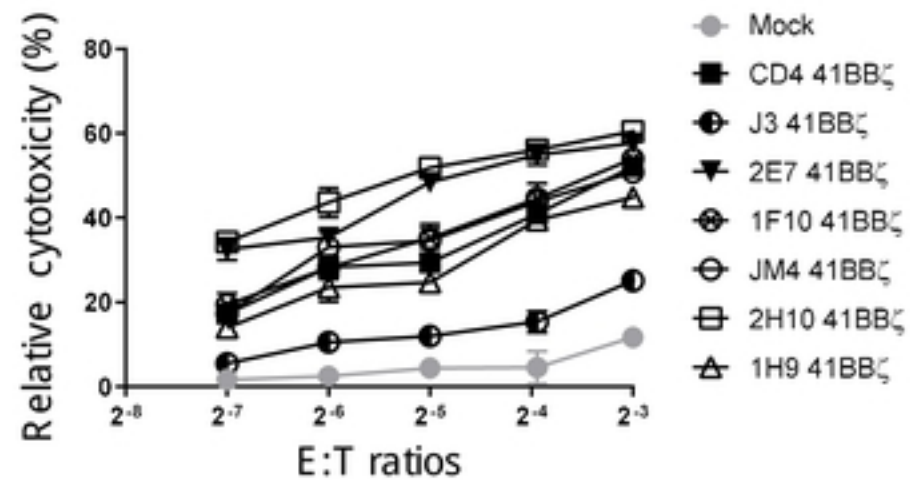

D

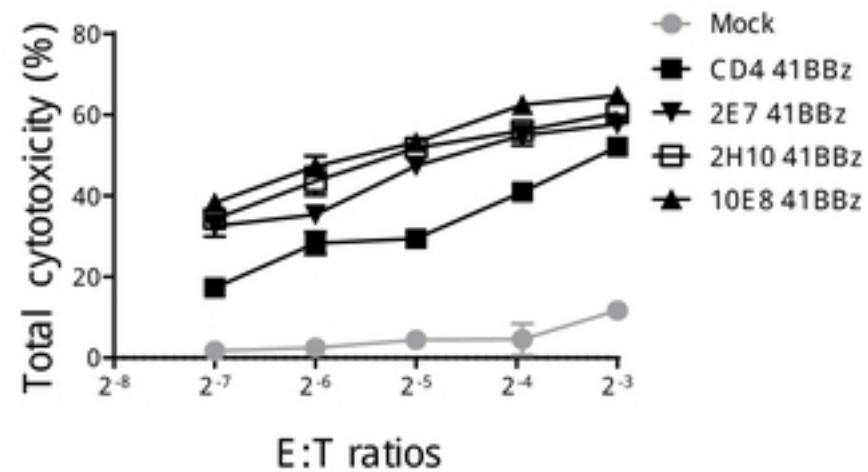

Fig 6



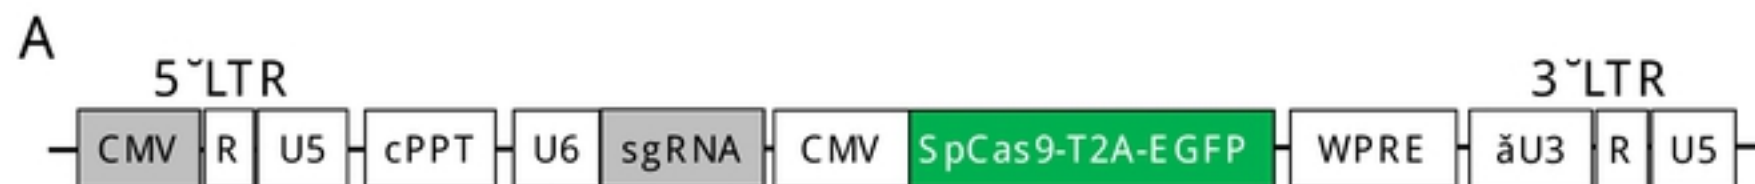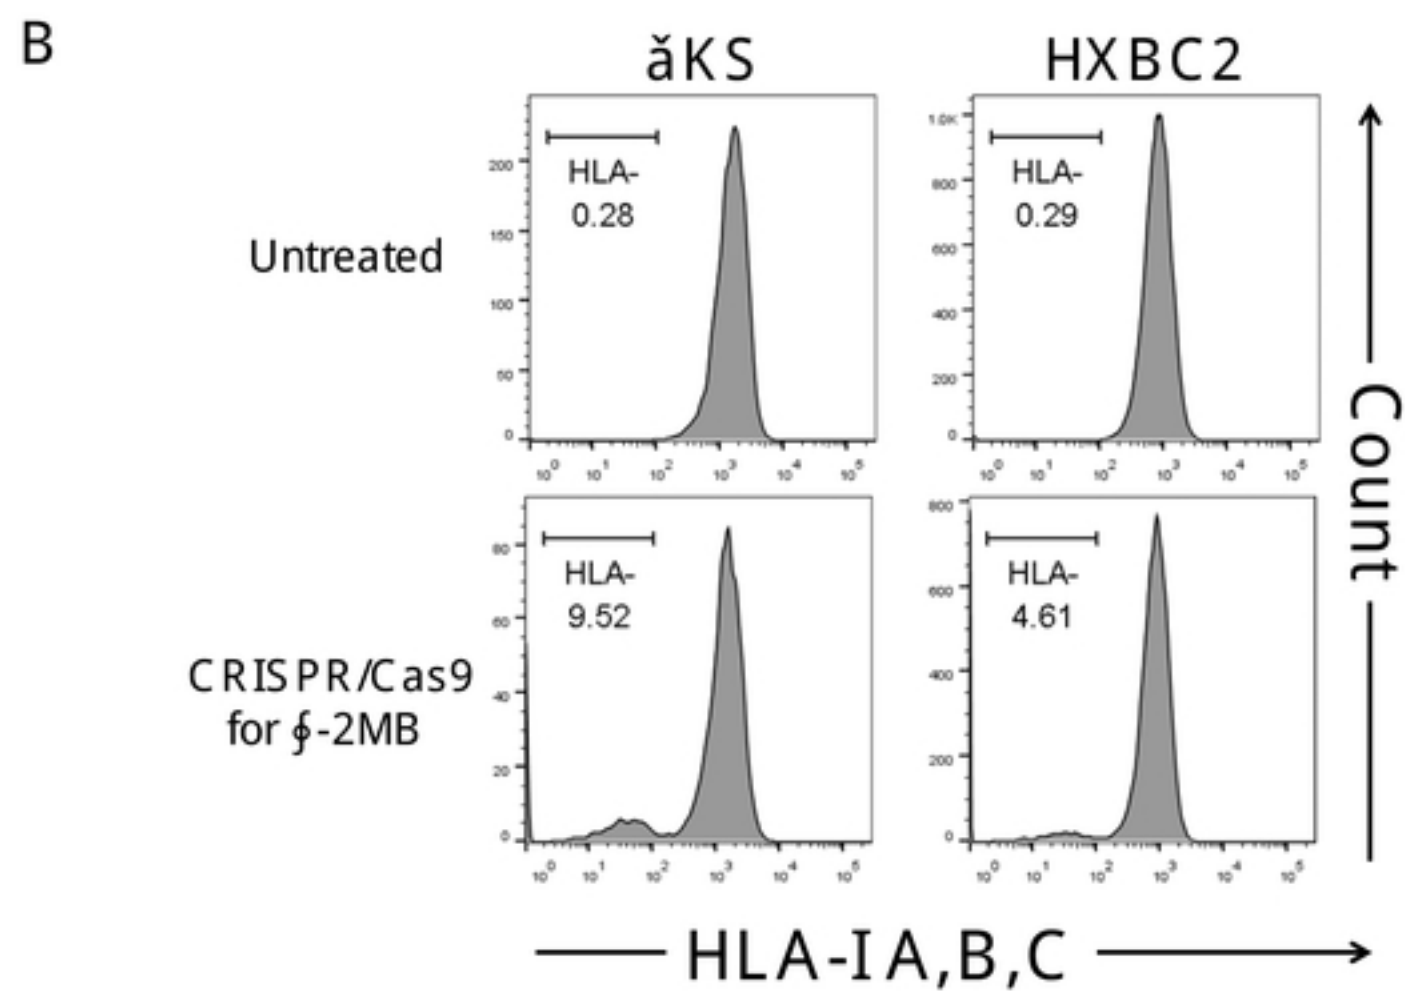

S Fig 1

A

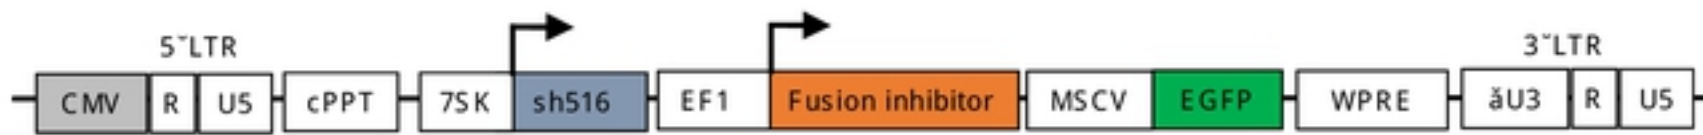

B

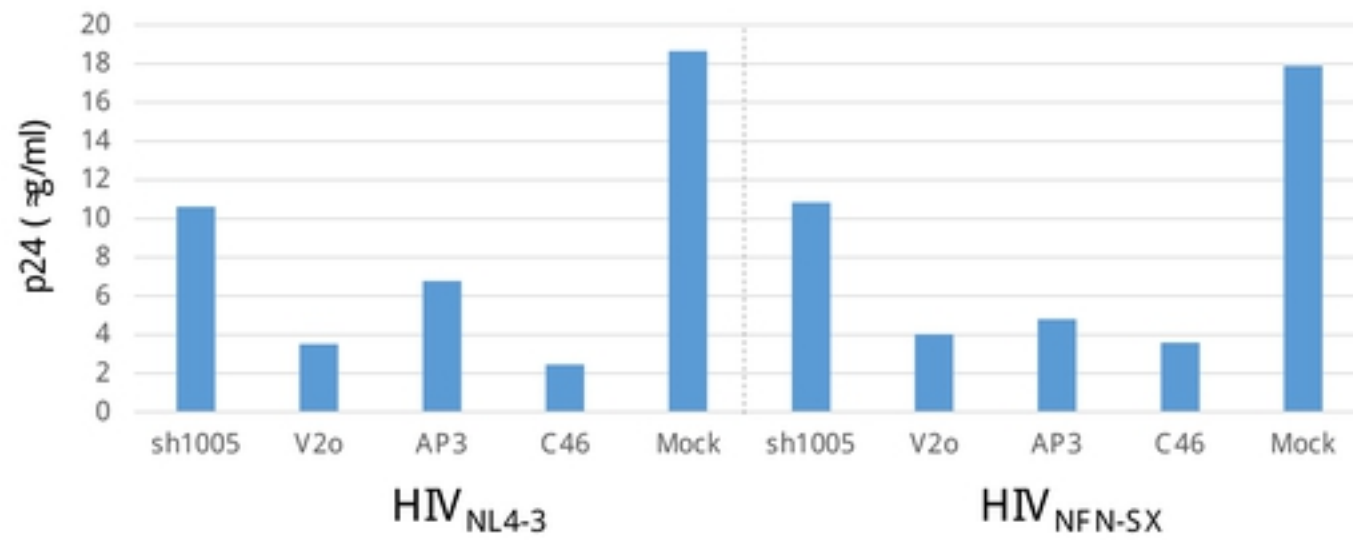

S Fig 2
